1 **Associations of mitochondrial DNA copy number with incident risks of**

2 **gastrointestinal cancers: a prospective case-cohort study**

3

4 Xin Guan<sup>a,1</sup>, Mengying Li<sup>a,1</sup>, Yansen Bai<sup>a</sup>, Yue Feng<sup>a</sup>, Guyanan Li<sup>a</sup>, Wei Wei<sup>a</sup>, Ming Fu<sup>a</sup>,

5 Hang Li<sup>a</sup>, Chenming Wang<sup>a</sup>, Jiali Jie<sup>a</sup>, Hua Meng<sup>a</sup>, Xiulong Wu<sup>a</sup>, Qilin Deng<sup>a</sup>, Fangqing

6 Li<sup>a</sup>, Handong Yang<sup>b</sup>, Xiaomin Zhang<sup>a</sup>, Meian He<sup>a</sup>, Huan Guo<sup>a,\*</sup>

7

8 **Authors' affiliations:**

9 <sup>a</sup>Department of Occupational and Environmental Health, State Key Laboratory of  
10 Environmental Health (Incubating), School of Public Health, Tongji Medical College,

11 Huazhong University of Science and Technology, 13 Hangkong Rd, Wuhan, China

12 <sup>b</sup>Dongfeng Central Hospital, Dongfeng Motor Corporation and Hubei University of  
13 Medicine, Shiyan, China.

14 <sup>1</sup>These authors contributed equally to this work.

15

16 **Declaration of competing financial interest:**

17 The authors declare no competing financial interest.

18

19 **\* Correspondence to:**

20 Huan Guo, MD, PhD, Professor, Department of Occupational and Environmental

21 Health, School of Public Health, Tongji Medical College, Huazhong University of

22 Science and Technology, 13 Hangkong Rd, Wuhan 430030, Hubei, China. Tel: 8627-

23 83657914; Fax: 86-27-83657765; E-mail: [ghuan5011@hust.edu.cn](mailto:ghuan5011@hust.edu.cn)

24

25 **Word counts: 4335**

26 **Abstract**

27 **Background** Epidemiological investigations implied that inter-individual variations of  
28 mitochondrial DNA copy number (mtDNAcn) could trigger predisposition to multiple  
29 cancers, but evidence regarding gastrointestinal cancers (GICs) was still uncertain.

30 **Methods** We conducted a case-cohort study within the prospective Dongfeng-Tongji  
31 cohort, including incident cases of colorectal cancer (CRC, n=278), gastric cancer (GC,  
32 n=138), and esophageal cancer (EC, n=72) as well as a random subcohort (n=1173),  
33 who were followed up from baseline to the end of 2018. Baseline blood mtDNAcn was  
34 determined with quantitative PCR assay, and associations of mtDNAcn with the GICs  
35 risks were estimated by using weighted Cox proportional hazards models.

36 **Results** Significant *U*-shaped associations were observed between mtDNAcn and risks  
37 of CRC, GC, EC, and total GICs. Compared to subjects within the 2<sup>nd</sup> quartile (Q2)  
38 mtDNAcn subgroup, those within the 1<sup>st</sup> (Q1), 3<sup>rd</sup> (Q3) and 4<sup>th</sup> (Q4) quartile subgroups  
39 showed increased risks of CRC [HR(95% CI)=2.27(1.47-3.52), 1.65(1.04-2.62), and  
40 2.81(1.85-4.28), respectively] and total GICs [HR(95% CI)=1.84(1.30-2.60), 1.47(1.03-  
41 2.10), and 2.51(1.82-3.47), respectively], and those within Q4 subgroup present  
42 elevated GC and EC risks [HR(95% CI)=2.16(1.31-3.54) and 2.38(1.13-5.02),  
43 respectively]. Similar associations of mtDNAcn with CRC and total GICs risks  
44 remained in stratified analyzes by age, gender, and smoking status. Notably, there were  
45 joint effects of age and smoking status with mtDNAcn on CRC and total GICs risks.

46    **Conclusions** This prospectively case-cohort study showed *U*-shaped associations  
47    between mtDNAcn and incident risks of GICs, but further researches are needed to  
48    confirm these results and uncover underlying biological mechanisms.

49

50    **Keywords:** gastrointestinal cancers; mitochondrial DNA copy number; U-shaped  
51    association; case-cohort study.

## 52 **Introduction**

53       Gastrointestinal cancers (GICs), including colorectal cancer (CRC), gastric cancer  
54 (GC), and esophageal cancer (EC), jointly account for over 22% of all cancer-related  
55 deaths and constitute over 21% and 13% of incident cancer cases among men and  
56 women, respectively (Sung et al. 2021). The incidences of GICs vary considerably by  
57 geographical regions, with approximately 40% of all cases occurring in China . Many  
58 risk factors contribute to the development of GICs, including chronic infection (e.g.,  
59 *Helicobacter pylori*), lifestyle-related factors (e.g., alcohol drinking), and unhealthy  
60 diet, especially foods conserved with nitrates and nitrites (Brenner, Kloor, and Pox  
61 2014, McCormack et al. 2017, Sung et al. 2021, Kumar et al. 2020, Smyth et al. 2020).  
62 However, because of the occult onset of GICs and a lack of specific screening methods  
63 for these cancers, GICs are always diagnosed at an advanced stage with poor survival  
64 outcomes (Brenner, Kloor, and Pox 2014, Codipilly et al. 2018, Zhang et al. 2018),  
65 which underlines the great demand to identify early biomarkers to discriminate high risk  
66 populations.

67       As a double-membrane organelle of eukaryotic cell, mitochondrion harbors its own  
68 DNA and plays a pivotal role in a series of biological process, including reactive  
69 oxygen species (ROS) and energy production (Lin and Beal 2006, Mishra and Chan  
70 2016). Mitochondrial DNA copy number (mtDNACn), a reflection of mitochondrial  
71 DNA (mtDNA) levels per cell, is a promising biomarker of mitochondrial function  
72 (Castellani et al. 2020). In fact, although the mtDNACn varies among different cell  
73 types, the regulation of mtDNACn is rigid and specific tissues/cells remain fairly stable

74 mtDNAcn. Abnormal mtDNAcn variation induced by oxidative damage or  
75 inflammation was reported to be associated many chronic diseases, e.g. cardiovascular  
76 disease, neurodegenerative and metabolic disorders (Carew and Huang 2002, Lee and  
77 Wei 2005, Liu et al. 2003, Wu et al. 2017, Nunnari and Suomalainen 2012). More  
78 importantly, mtDNAcn alterations have also been observed in many types of cancers  
79 (e.g., breast cancer, prostate cancer), and may treated as a latent susceptible or  
80 diagnostic biomarker (Shen et al. 2015, Xu et al. 2020). Some epidemiological studies  
81 have investigated the associations of mtDNAcn with GICs but with inconsistent  
82 findings. Pilot data from two prior retrospective case-control studies in China and India  
83 revealed the positive association between high mtDNAcn and increased risk of CRC  
84 (Qu et al. 2011, Kumar et al. 2017), but another two CRC nested case-control studies in  
85 Shanghai Women's Health Study (SWHS) and Nurse's Health Study (NHS) reported  
86 inverse associations (Huang et al. 2014, Yang et al. 2019). Similar divergent results  
87 were also observed for the association of mtDNAcn with GC risk. An early case-control  
88 study (984 pairs) showed a positive relationship of mtDNAcn with GC risk (Zhu et al.  
89 2017), but another nested case-control study of 162 GC cases and 299 controls reported  
90 null significant association (Liao et al. 2011). Only one small sample-sized (218 pairs)  
91 case-control study investigated the association of mtDNAcn with EC and found lower  
92 level of mtDNAcn in EC cases than in controls (Xu et al. 2013). Given the  
93 aforementioned conflicting findings, the relationships between mtDNAcn and GICs still  
94 need to be illustrated in larger prospective studies.

95 To the best of our knowledge, no prior studies have prospectively evaluated  
96 associations of mtDNAcn with GICs risks comprehensively. Here, we performed a  
97 prospective case-cohort study based on the Dongfeng-Tongji (DFTJ) cohort, including a  
98 random subcohort with 1173 subjects and 488 incident GICs (including 278 CRC, 138  
99 GC, and 72 EC), to investigate the associations of blood mtDNAcn with incident risks  
100 of CRC, GC, EC, and total GICs.

## 101 **Materials and methods**

### 102 *Study population*

103 All subjects were participants from the DFTJ cohort, an ongoing population-based  
104 longitudinal study initiated in 2008 with enrollment of 27,009 retired employees from  
105 Dongfeng Motor Corporation (DMC) in Shiyan, Hubei, China. Details on the  
106 methodology for DFTJ cohort have been described previously (Wang et al. 2013). In  
107 brief, all participants voluntarily responded to the baseline questionnaires and  
108 completed medical examination during the period from September 2008 to June 2010.  
109 Meanwhile, a 15 mL of fasting venous blood sample donated by each subject was  
110 collected and sorted at -80°C before laboratory determinations.

111 The study protocol was ethically approved by the Ethics and Human Subject  
112 Committee of Tongji Medical College, Huazhong University of Science and  
113 Technology, and the written informed consent was obtained from each subject.

### 114 *Case-cohort study design and covariates assessment*

115           Among the total 27,009 participants, after excluding those without available DNA  
116   samples ( $n=4784$ ) or who had previous history of cancer ( $n=427$ ) or who were lost to  
117   follow-up ( $n=140$ ), the remained 21,658 participants were treated as the base cohort  
118   with the median follow-up time of 10.3 years. Subsequently, we randomly selected a  
119   representative subcohort of 1173 subjects within the base cohort by age- and gender-  
120   stratified sampling with an overall sampling rate of 5% (**Table S1**). Incident cases of  
121   GICs among the cohort population were identified by conducting the periodic record  
122   linkage analysis with the database from the local healthcare service systems, including  
123   five designated hospital of DMC, Social Insurance Centers, and the Center of Disease  
124   Control and Preventions. Cancer incidence data were available till Dec 31, 2018 and  
125   defined by professional physicians using the International Classification of Diseases,  
126   10<sup>th</sup> Revision (ICD-10). Among the 21,658 participants, we identified a total of 488  
127   newly diagnosed GICs, including 278 incident CRC cases (C18.2-C20, 14 were in  
128   subcohort), 138 incident GC cases (C16.0-C16.9, 6 were in subcohort), and 72 incident  
129   EC cases (C15.0-C15.9, 5 were in subcohort). Hence, a total of 1636 participants were  
130   finally enrolled in this case-cohort study. The detailed selection criteria and cases  
131   distribution are shown in **Fig. 1**.

132           The general information of all participants including demographic characteristics  
133   (e.g., age, gender, and education levels), lifestyles (status of smoking, alcohol drinking,  
134   and physical exercise), and chronic diseases history were recorded by conducting in-  
135   person interviews and completing structured questionnaires. Education achievements  
136   were coded as primary school or below, middle school, high school or beyond.

137 Individuals who had smoked >1 cigarette per day for more than half a year were  
138 considered as current smokers and those who quit smoking for more than six months  
139 were defined as former smokers, while the other subjects were never smokers.  
140 Participants who had drunk alcohol more than once a week for at least six months were  
141 defined as current alcohol drinkers, and former alcohol drinkers were those who had  
142 ever drunk alcohol but quit for more than half a year. Otherwise, individuals were  
143 considered as never drinkers. Because of the low proportions of former smokers  
144 (<11.5%) and former drinkers (<6%) in the base cohort, we categorized current and  
145 former smokers into ever smokers, while former and never drinkers were merged into  
146 non-current drinkers. Regular physical exercises were considered as >20 min a time  
147 with at least five times per week and kept over half a year. The body mass index (BMI)  
148 was calculated according to the weight in kilograms divided by the square of height in  
149 meters (kg/m<sup>2</sup>). Basing on the first-degree familial information recorded, family history  
150 of cancer was defined as yes or no. The measurement of peripheral blood cells was  
151 conducted by using CELL-DYN 3700 (Abbott, USA) in accordance with standardized  
152 protocols.

### 153 ***Determination of blood mtDNAcn at baseline***

154 The total genomic DNA was extracted from peripheral blood samples by using  
155 Whole Blood DNA Extraction kit (BioTeke, Beijing, China). The quantitative real-time  
156 PCR (RT-PCR) was performed to measure relative mtDNAcn by using a high-  
157 throughput 384-well format with the QuantStudio™ 7 Flex Real-Time System (Applied  
158 Biosystems, CA, USA) as prior description with minor modifications (Janssen et al.



159 2012). In brief, each PCR reaction was conducted by wielding 1uL DNA sample (10  
160 ng/uL) in a final volume of 10 uL per well. For mitochondrion amplification mixture,  
161 1× PowerUp SYBR Green Master Mix (Applied Biosystems, 5uL/reaction ), *ND1*  
162 primer [(300nmol/L FP 5'-ATGGCCAACCTCCTACTCCT-3', 300nmol/L RP 5'-  
163 CTACAACGTTGGGGCCTTT -3'), (4 uL/reaction)] and RNase free water were  
164 contained, while the single-copy gene reaction mixture consisted of 1× PowerUp SYBR  
165 Green Master Mix (Applied Biosystems, 5 uL/reaction ), *ACTB* primer [(300nmol/L FP  
166 5'-ACTCTTCCAGCCTTCCTTCC-3', 300nmol/L RP 5'-  
167 GGCAGGACTTAGCTTCCACA-3'), 4 uL/reaction] and RNase free water. The RT-  
168 PCR detection for *ND1* and *ACTB* copy number was assayed in triplicates in the same  
169 run, with thermal cycling profile proceeded at 50°C and 95 °C for 2 min respectively,  
170 followed by 40 cycles of 95°C for 15s and 60°C for 1min. The mtDNAcn was  
171 determined by using the ratio of mitochondrial gene (*ND1*) copy number to the single -  
172 copy reference gene (*ACTB*) copy number. For each 384-well plate, 200 DNA samples  
173 randomly selected from our study were equally pooled as the reference and  
174 subsequently serially diluted 1:2 to generate a six-point standard curve (SC) with  
175 concentration ranging from 1.25~40 ng/μL, and R<sup>2</sup> coefficient derived from the SC  
176 was >0.99. To ensure the quality of the measurement, the detection would be repeated if  
177 standard deviations (SD) of three cycle threshold (Ct) for any primers were greater than  
178 0.30. Hence, the coefficient of variation (CV) calculated from the difference between  
179 *ND1* and *ACTB* Ct values presented preferable results that the inter- and intra- CV  
180 values were both less than 3%. To minimize the batch effects, all samples were tested

181 randomly and values of mtDNAcn were normalized to the calibrator samples derived  
182 from the SC with concentration of 10 ng/uL.

### 183 *Statistical analysis*

184 To explore the normality of continuous data, one-sample Kolmogorov-Smirnov  
185 test was performed. Mann-whitney  $U$  and Student's  $t$ -test were conducted to estimate  
186 the difference of continuous variables between the incident GICs cases and controls in  
187 the subcohort, while Chi-square test was used for categorical data. Notably, since  
188 participants in the subcohort were free of cancer at baseline visit, for each specific  
189 subtype of GICs occurring, cases of the remaining cancer types in the subcohort were  
190 treated as controls (Pritchett et al. 2020). The mtDNAcn was log<sub>2</sub>-transformed to  
191 approach normality for further analysis. The associations of baseline characteristics with  
192 mtDNAcn were assessed by performing generalized linear models, with adjustment for  
193 age and gender.

194 Follow-up time was calculated from the date of enrollment to the date of GICs  
195 diagnosis, death, or December 31, 2018, whichever occurred first. Considering the  
196 difference of mtDNAcn between males and females, we categorized all participants into  
197 four subgroups according to the sex-specific quartiles of mtDNAcn in the subcohort  
198 subjects to evaluate the associations of mtDNAcn with incident risks of GICs  
199 (Thyagarajan et al. 2012). Subsequently, to handle with the oversampling of cases, the  
200 inverse probability weights and the robust sandwich variance estimators were  
201 performed, and adjusted hazard ratios (HRs) and 95% confidence intervals (CIs) were  
202 estimated by weighted Cox proportional hazards models (Barlow et al. 1999), with

203 subjects in the 2<sup>nd</sup> quartile (Q2) subgroup of mtDNAcn used as the reference group.  
204 Models were adjusted for age, gender, BMI, education levels (primary school or below,  
205 middle school, high school or beyond), smoking status (ever smokers/ non-smokers),  
206 alcohol drinking status (current/non-current drinkers), physical exercise (yes/no), and  
207 family history of cancer (yes/no). Furthermore, in order to explore the non-linear  
208 associations of mtDNAcn with GICs risks, the restricted cubic spline (RCS) regression  
209 models were conducted with knots at corresponding 5<sup>th</sup>, 50<sup>th</sup>, and 95<sup>th</sup> percentiles, and  
210 the median of log<sub>2</sub>-transformed mtDNAcn was used as the reference value.

211 Next, we conducted stratified analysis by age (<65 y or ≥65 y), gender, and  
212 smoking status (ever smokers/ non-smokers) to explore the associations of mtDNAcn  
213 with CRC and total GICs risks in each stratum. The joint effects of mtDNAcn with age  
214 and smoking status were also evaluated. Given the comparative limited incident  
215 numbers of GC ( $n=138$ ) and EC ( $n=72$ ), the effects of mtDNAcn in aforementioned  
216 stratum were not evaluated for these two cancer types. To verify the robustness of our  
217 results, we subsequently implemented sensitivity analyses by adjusting for peripheral  
218 blood cells counts, or excluding participants diagnosed as GICs within the first two  
219 years of follow-up in the associations of mtDNAcn with GICs risks.

220 All statistical analyses were two-sided with  $P < 0.05$  defined as statistically  
221 significant. SAS program (version 9.4, SAS Institute, Carry, NC) and R software  
222 (version 4.0.2) were used for data processing.

## 223 **Results**

### 224 *General characteristics of study participants*

225 Baseline characteristics, as well as levels of mtDNAcn, among the incident GICs  
226 cases and 1173 subcohort participants were presented in **Table 1**. The median follow-up  
227 period for the entire subcohort was 10.3 years. Compared to non-cases in the subcohort,  
228 the incident GICs cases were elder, more males and cigarette smokers, less educated  
229 (except for EC cases), and had a higher proportion of alcohol consumption (only for EC  
230 and total GICs cases) (All  $P<0.05$ ). The incident cases of GC and total GICs both  
231 showed significantly higher level of mtDNAcn than the controls [median (interquartile  
232 range, IQR) of 1.00(0.78, 1.41) for GC and 1.00(0.73, 1.37) for total GICs v.s.  
233 0.93(0.77, 1.15) for controls, both  $P<0.05$ ], while the levels of mtDNAcn in incident  
234 CRC and EC cases were suggestive elevated but did not reach the statistical significance  
235 ( $P=0.063$  and  $0.377$ , respectively).

236 As **Fig. S1** depicted, the normality of mtDNAcn was improved by log<sub>2</sub>-  
237 transformation. Females had a significantly higher level of mtDNAcn than males  
238 [0.96(0.81, 1.18) vs. 0.89(0.72, 1.11),  $P<0.001$ ]. The associations of baseline  
239 characteristics with mtDNAcn were presented in **Table S2**.

#### 240 *Associations of mtDNAcn with GICs risks*

241 The associations of blood mtDNAcn with GICs risks were summarized in **Table 2**.  
242 Compared to subjects within the Q2 subgroup of mtDNAcn, there was a significantly  
243 elevated risk of incident CRC for those within the 1<sup>st</sup> (Q1), 3<sup>rd</sup> (Q3) and 4<sup>th</sup> (Q4) quartile  
244 subgroups of mtDNAcn [HR(95%CI)=2.27(1.47, 3.52), 1.65(1.04, 2.62) and  
245 2.81(1.85,4.28), respectively]. Similar results were also observed for the associations of  
246 Q1, Q3 and Q4 mtDNAcn subgroups with incident risk of total GICs when compared to

247 the Q2 mtDNAcn subgroup, with HR(95%CI) presented as 1.84(1.30, 2.60), 1.47(1.03,  
248 2.10), and 2.51(1.82, 3.47) respectively. However, only the Q4 subgroup of mtDNAcn  
249 revealed significantly increased risks of GC and EC with the comparison of Q2  
250 subgroup [HR(95%CI)=2.16 (1.31, 3.54) and 2.38(1.13, 5.02), respectively]. We further  
251 estimated the non-linear correlations between mtDNAcn and GICs risks by using RCS  
252 function, and observed the evident *U*-shaped associations of mtDNAcn with incident  
253 risks of CRC, GC, EC, and total GICs (all *P* for non-linear associations <0.05, **Fig. 2**).  
254 The above findings were not materially altered after further adjustment for platelet and  
255 white blood cell counts (**Table S3**), or excluding the incident GICs cases diagnosed  
256 within two years of follow-up, or excluding the other cancer cases when performing  
257 analysis for one specific type of GICs (**Table 2**).

### 258 *Stratification analysis*

259 Since there were limited numbers of GC (n=138) and EC (n=72) cases, the further  
260 stratification analyses by age, gender, and smoking status were only conducted for CRC  
261 and total GICs. Individuals with age <65 years old showed increased risks of CRC and  
262 total GICs in Q1 and Q4 mtDNAcn subgroups when compared with the Q2 subgroup  
263 [CRC: HR(95%CI) = 2.34(1.23, 4.46) and 2.58(1.36, 4.88); total GICs:  
264 HR(95%CI)=1.95(1.20, 3.18) and 2.22(1.38, 3.56)] (**Fig. 3A**). We also observed  
265 elevated risks of CRC [v.s. Q2 subgroup of mtDNAcn, HR(95%CI)=2.19(1.22, 3.92)  
266 for Q1 and 2.84(1.63, 4.94) for Q4 subgroups] and total GICs [v.s. Q2 subgroup of  
267 mtDNAcn, HR(95%CI)=1.80(1.11, 2.91), 1.82(1.10, 3.04)], and 2.71(1.73, 4.25) for  
268 Q1, Q3, and Q4 subgroups] among participants with age ≥65 (**Fig. 3A**).

269 Among males, with the comparison of Q2 mtDNAcn subgroup, the Q1 and Q4  
270 subgroups consistently showed raised risks of CRC [Q1: HR(95%CI)=2.19(1.25, 3.85),  
271 Q4: HR(95%CI)=2.54(1.47, 4.40)] and total GICs [Q1: HR(95%CI)=1.75(1.13, 2.71),  
272 Q4: HR(95%CI)=2.05(1.34, 3.12)], while the corresponding effects were strengthened  
273 among females that the Q1, Q3 and Q4 mtDNAcn subgroups presented 2.41-fold  
274 (95%CI: 1.17, 4.95), 2.66-fold (95%CI: 1.29, 5.49), and 3.48-fold (95%CI: 1.75, 6.92)  
275 risk of CRC, and 2.10-fold (95%CI: 1.16, 3.77), 2.19-fold (95%CI: 1.22, 3.94), and  
276 3.63-fold (95%CI: 2.11, 6.25) risk of total GICs (**Fig. 3B**).

277 Among ever smokers, we only observed elevated risks of CRC and total GICs in  
278 Q4 mtDNAcn subgroups when compared with the Q2 subgroup [HR (95%  
279 CI)=3.72(1.81, 7.61) and 2.43(1.45, 4.08), respectively] (**Fig. 3C**). Among non-  
280 smokers, the significant increased risks of CRC and total GICs were observed among  
281 Q1, Q3, and Q4 subgroups [CRC: HR(95%CI)=2.41(1.41, 4.14), 2.01(1.15, 3.52),  
282 2.39(1.41, 4.04), respectively; GICs: HR(95%CI)=2.07(1.32, 3.26), 1.82(1.15, 2.88),  
283 2.62(1.17, 4.01), respectively] (**Fig. 3C**). However, we did not observe the modification  
284 effects of age, gender, and smoking status on the associations of mtDNAcn with CRC  
285 and total GICs risks (all  $P_{\text{interaction}} > 0.05$ , **Fig. 3**).

### 286 *Joint effects of mtDNAcn with age and smoking status*

287 We further investigate the joint effects of mtDNAcn with age and smoking status  
288 on the incident risks of CRC and total GICs. When using subjects aged < 65 and within  
289 the Q2 mtDNAcn subgroup as the reference group, there were significantly increased  
290 incident risk of CRC [HR(95%CI)=3.75(2.01, 6.99), 2.71(1.37, 5.37), and 4.89(2.69,

291 8.92)] and total GICs [HR(95% CI)=2.51(1.56, 4.03), 2.52(1.52, 4.17), and 3.78(2.43,  
292 5.90), respectively] among subjects with age  $\geq 65$  and within Q1, Q3, and Q4 mtDNAcn  
293 subgroups (**Fig. 4**). Compared to non-smokers within Q2 mtDNAcn subgroup, we also  
294 observed significant increased risk of CRC among ever smokers within Q1 and Q4  
295 mtDNAcn subgroups [HR(95% CI)=2.54(1.32, 4.91) and 4.48(2.39, 8.37), respectively],  
296 and increased risk of total GICs among ever smokers within Q1, Q3, and Q4 subgroups  
297 [HR(95% CI)=2.67(1.58, 4.53), 1.88(1.08, 3.28), and 4.10(2.46, 6.81), respectively]  
298 (**Fig. 4**).

## 299 Discussion

300 In this prospective case-cohort study, we observed that comparatively lower and  
301 higher levels of blood mtDNAcn were associated with 47% to 181% increased incident  
302 risks of GICs. The nonlinear *U*-shaped associations of mtDNAcn with CRC, GC, EC  
303 and total GICs were further manifested by the RCS curves. In addition, we observed the  
304 joint effects of mtDNAcn with elder age ( $\geq 65$  years-old) and tobacco smoking on  
305 increased risks of CRC and total GICs. These findings provided novel prospective  
306 epidemiological evidence for the effect of mtDNAcn on the development of GICs.

307 Chronic accumulation in oxygen radical generation in mitochondria could result in  
308 catastrophic cycle of mtDNA damage as well as functional impairment. This would  
309 promote ROS (e.g., superoxide and hydroxyl radicals) production, and cause cellular  
310 defective apoptosis regulation, which might generate increased nuclear DNA damage  
311 and potentiated carcinogenesis (Chan 2020, Idelchik et al. 2017). Recently, increasing  
312 studies have assessed that either low or high level of mtDNAcn was correlated with

313 elevated risk of cancer in type-specific manner (Sun et al. 2016, Zheng et al. 2019, He et  
314 al. 2014). However, relevant epidemiological evidence on the associations between  
315 mtDNAcn and GICs is limited. In this prospective case-cohort study, we observed  
316 significant nonlinear *U*-shaped associations of blood mtDNAcn with the developments  
317 of CRC, GC, and EC, which indicated that individuals with low and high mtDNAcn had  
318 elevated incident risks of GICs. To be consistent with our results, Thyagarajan et al.  
319 also observed a significant *U*-shaped relationship between mtDNAcn and CRC risk  
320 ( $P_{\text{curvilinearity}} < 0.001$ ) in a nested case-control study of 422 CRC cases and 874 controls,  
321 while this effect was presented in both men and women participants (Thyagarajan et al.  
322 2012). But another Chinese nested case-control study did not observe the significant  
323 association between mtDNAcn and GC risk (Liao et al. 2011, Sun et al. 2014). Relevant  
324 population-based evidence for the association between mtDNAcn and EC risk was  
325 actually scanty. Hence, our finding of *U*-shaped pattern in the relationship between  
326 mtDNAcn and EC risk is novel and could be an objective supplement of prospective  
327 epidemiological evidence. In general, the contradictory in reported relationship  
328 directions between mtDNA and GICs risks could be partially attributed to the nonlinear  
329 *U*-shaped pattern, as well as the population select bias, sample size limitation, random  
330 chance, and reverse causality. Therefore, larger and well-designed studies, especially  
331 the longitudinal cohort designs, are warranted to replicate our findings in different  
332 ethnic populations.

333       The mechanisms underlying the associations of blood mtDNAcn with GICs  
334 etiology are not completely understood, but some existed evidence demonstrates that



335 the *U*-shaped associations are biologically plausible. Mitochondria play a vital role in  
336 the evolution of tumor cell genome, acting as a double-edged sword in cancer  
337 developing. An *in vitro* study found that the H<sub>2</sub>O<sub>2</sub> treated lung fibroblast (MRC-5)  
338 could be blocked at G(0) and G(1) phases accompanying with ROS generation, and  
339 further mtDNA content was significantly elevated in the concentration and time  
340 dependent manner, indicating that mild oxidative stress may trigger increase of mtDNA  
341 through the cell-cycle arrest pathway (Lee et al. 2000). Also, one previous two-stage  
342 case-control study reported that high level of 8-hydroxy-2'-deoxyguanosine (8-OHdG)  
343 (Zheng et al. 2019), an widely used biomarker of DNA oxidative damage and well  
344 documented in GICs development(Guo et al. 2016, Ma et al. 2013), were associated  
345 with increased mtDNAcn. Another two independent studies revealed that mtDNAcn  
346 was significantly higher in tumor tissue of CRC patients than the corresponding normal  
347 tissues (Lim et al. 2012, Gao et al. 2015). These findings propose the hypothesis that  
348 ROS might induce mtDNAcn and further cause more oxidative damage to intracellular  
349 DNA and other constituents, which might accelerate the initiation and progression of  
350 tumorigenesis (Dizdaroglu 2015). Whereas, it should not be neglect that increased  
351 mtDNAcn generated from ageing cells as a result of the feedback response  
352 compensating for aberrant mitochondria respiratory chain or mtDNAcn mutation (Lee  
353 and Wei 2005), might mask the association between elevated mtDNAcn and raised risks  
354 of GICs.

355       Once the rate of oxidative injury overwhelms the capacity of the compensation  
356 mechanism of mtDNA, the impermanent increased mtDNAcn can no longer deal with

357 the oxidative stress, and followed by eventual attrition of mtDNA that would trigger a  
358 net decrease in mtDNAcn, since the mtDNA was degraded by the intracellular enzyme  
359 system to prevent excessive accumulation damage of oxidative stress (Shokolenko et al.  
360 2009, Lee and Wei 2005). A prior *in vitro* study observed that a decrease in  
361 mitochondria in HeLa cells would result in raised lipid peroxidation and reduced  
362 activity of antioxidant enzyme (e.g., catalase), and further induced elevated DNA  
363 damage in response to the oxidative stress (Delsite et al. 2003). More recently, an *in*  
364 *vivo* study conducted among mice revealed that impaired mitochondrial would release  
365 oxidized mtDNA into cytosol and subsequently activate the inflammasomes (Shimada  
366 et al. 2012), which can trigger the production of proinflammatory cytokines including  
367 interleukin-1 $\beta$  (IL-1 $\beta$ ) and interleukin-18 (IL-18) (Zhong, Liang, and Zhong 2019).  
368 Consistent with the vital role of the inflammasomes in activating inflammatory reaction,  
369 high levels of released IL-1 $\beta$  and IL-18 have been correlated with increased risks of  
370 CRC and GC (Kolb et al. 2014, Haghshenas et al. 2009). In general, the aforementioned  
371 findings support the plausible biologic mechanisms by which the lower mtDNAcn  
372 might be related with elevated risks of GICs, but the pathogenesis effects of mtDNAcn  
373 still need validations and further in-depth investigations.

374 Since the gastrointestinal system owned similar mucosa epithelial barrier, the  
375 homeostasis of epithelial cell played a vital role in the normal gastrointestinal functional  
376 progression (Shalapour and Karin 2020). It should be realized that mitochondrial  
377 dysfunction and mtDNA variation may cause abnormal epithelium energy metabolism,  
378 which would lead to the loss of epithelial barrier integrity (Hu et al. 2018). Once the

379 protective barrier was compromised, numerous microbes and their products would  
380 result in activation of inflammation factor NF- $\kappa$ B and induction of IL-6 and TNF, which  
381 can promote the development of colon and liver cancers (Greten et al. 2004, Pikarsky et  
382 al. 2004). These roles might explain the consistent effects of mtDNAcn on CRC, GC,  
383 and EC incident risks found in our study. Also, the present study showed robust *U*-  
384 shaped association of mtDNAcn with CRC and total GICs risks among subjects with the  
385 strata of age, smoking status, and gender, which were consistent with two prior studies  
386 (Thyagarajan et al. 2012, Wang et al. 2018). Especially, our findings of more robust  
387 effects among women than men were in line with previous results (Thyagarajan et al.  
388 2012). One possible mechanism might because females seem be more susceptible to  
389 oxidative damage induced by hormone stimulation. As shown in experimentally human  
390 breast cancer cell lines MCF7, estrogen exposure revealed increased mitochondrial ROS  
391 production, suggesting that estrogen might contribute to susceptibility of oxidative  
392 injury among females (Parkash, Felty, and Roy 2006). Additionally, we observed the  
393 combined effect of mtDNAcn with age and smoking status on risks of developing CRC  
394 and total GICs, which might result from the shared features of increasing ROS by aging  
395 and smoking, as well as mitochondrial dysfunction (Parajuli et al. 2013, Liguori et al.  
396 2018, Shokolenko et al. 2009). Nevertheless, the associations of blood mtDNAcn with  
397 incident risks of CRC and total GICs could not be modified by age, gender, and  
398 smoking status, indicating that mtDNAcn was an independent risk factor.

399 This study was the first to provide prospective epidemiological evidence on the  
400 nonlinear *U*-shaped associations of mtDNAcn with GC, EC, and total GICs risks, as

401 well as validating *U*-shaped pattern between mtDNAcn and CRC risk reported in a prior  
402 nested-case control study (Thyagarajan et al. 2012). The prospective design here owns  
403 more power to illuminate time order and causal relationships than the case-control  
404 designs. Additionally, the case-cohort analysis including three types of GICs can be  
405 performed with the same comparison group, improving the statistical efficiency and  
406 coping with multiple outcomes of interest (Barlow et al. 1999). Since large longitudinal  
407 designs with few observed outcomes might require massive resources to identify  
408 covariate information, the case-cohort frame can complete data collection with less cost  
409 and be more flexibility, providing both a window on the entire cohort and the chance to  
410 evaluate quality control (Barlow et al. 1999). Meanwhile, after excluding GICs  
411 diagnosed within 2 years of cohort entry or adjusting possible confounds (e.g., platelet  
412 and white blood cell counts), the *U*-shaped pattern still existed, indicating the robust  
413 associations between mtDNAcn and GICs risks found in our study.

414       However, several limitations should also be noted. Firstly, we only measured the  
415 blood mtDNAcn in a single time-point at baseline, which may not reflect mtDNAcn  
416 variation over a lifetime and therefore might result in an attenuated estimation.  
417 However, Campa et al. measured two-time point mtDNAcn over 15-year period among  
418 96 participants showed satisfactory stability with a high intraclass correlation  
419 (ICC=0.60) (Campa et al. 2018). In addition, we measured the levels of mtDNAcn in  
420 peripheral blood but not in the target GICs tissues, but another study identified a  
421 relatively high correlation between mtDNAcn derived from colorectal tissues and their  
422 corresponding peripheral blood ( $r=0.659$ ,  $P=0.038$ ) (Qu et al. 2011). Secondly, the

423 sample size in our study was suggested sufficient for overall analysis, but was limited  
424 for stratification and interaction analysis as well as joint effect estimation, especially for  
425 GC and EC cases. Further studies with larger sample size are needed to validate the  
426 current findings. Thirdly, our study did not collect information of *H. pylori* infection  
427 status, so we could not assess the effects of *H. pylori* on the association of mtDNAcn  
428 with GC. Finally, the current investigations were conducted only in a Chinese  
429 population, which might restrict the generalizability of the current findings to other  
430 ethnic populations. More epidemiology researches with larger sample size and diverse  
431 human races are needed to confirm our findings and the underlying biological  
432 mechanisms warrant further investigations by *in vivo* and *vitro* studies.

### 433 **Conclusions**

434 In summary, the current prospective case-cohort study indicates that both low and  
435 high mtDNAcn in peripheral blood are associated with 47% to 181% increased risks of  
436 CRC, GC, EC and total GICs in a middle-aged and older Chinese population. The  
437 robustness *U*-shaped association pattern provides valuable clues for better  
438 understanding the biological roles of mitochondrial underlying GICs development, and  
439 implies the potential of mtDNAcn as non-invasive biomarker for GICs risk prediction.

440 **Acknowledgements**

441 The authors want to thank all volunteers and medical assistants from the Dongfeng

442 Motor Corporation in Shiyan, Hubei, China.

443 **Authors' contributions**

444 **Xin Guan:** Conceptualization, Methodology, Writing- Original Draft, Writing-Review  
445 & Editing. **Mengying Li:** Conceptualization, Methodology, Formal analysis. **Yansen**  
446 **Bai:** Formal analysis, Methodology, Investigation. **Yue Feng, Guyanan Li, Wei Wei,**  
447 **Ming Fu and Hang Li:** Investigation. **Chenming Wang, Jiali Jie, Hua Meng,**  
448 **Xiulong Wu, Qilin Deng, Fangqing Li:** Methodology. **Handong Yang, Xiaomin**  
449 **Zhang, and Meian He:** Resources. **Huan Guo\*:** Project administration,  
450 Conceptualization, Writing- Original Draft, Writing-Review & Editing, Funding  
451 acquisition. All authors critically reviewed the manuscript and approved the final  
452 version of the manuscript.

453 **Funding**

454 This study was supported by the funds from the National Key Research and  
455 Development Program of China (Grant No.2018YFC2000203) and National Youth Top  
456 Talent Support Program to H.G., as well as supported by the Fundamental Research  
457 Funds for the Central Universities, HUST: 2020JYCXJJ020.



458 **Availability of data and materials**

459 Data sharing is not applicable to this paper as the datasets generated needed to be

460 confidential.

461 **Ethics approval and consent to participate**

462 The study protocol was ethically approved by the Ethics and Human Subject Committee  
463 of Tongji Medical College, Huazhong University of Science and Technology. Informed  
464 consent was obtained from all participants.

465

466 **Consent for publication**

467 The authors have consented to publication after having read the final manuscript.

468

469 **Competing interests**

470 The authors declare that they have no conflict of interest.

## 471   **References**

- 472   World Health Organization. The Global Cancer Observatory Reports. International Agency for Research  
473       on Cancer 2021. Available from: <http://globocan.iarc.fr>, accessed on 11/12/2021.
- 474   Barlow, W. E., L. Ichikawa, D. Rosner, and S. Izumi. 1999. Analysis of case-cohort designs. *Journal of*  
475       *clinical epidemiology* 52 (12):1165-1172. DOI: [http://10.1016/s0895-4356\(99\)00102-x](http://10.1016/s0895-4356(99)00102-x), PMID:  
476       10580779.
- 477   Brenner, Hermann, Matthias Kloor, and Christian Peter Pox. 2014. Colorectal cancer. *Lancet* 383  
478       (9927):1490-1502. DOI: [http://10.1016/S0140-6736\(13\)61649-9](http://10.1016/S0140-6736(13)61649-9), PMID: 24225001.
- 479   Campa, Daniele, Myrto Barrdahl, Aurelia Santoro, Gianluca Severi, Laura Baglietto, Hanane  
480       Omichessan, Rosario Tumino, H. B. As Bueno-de-Mesquita, Petra H. Peeters, Elisabete  
481       Weiderpass, Maria-Dolores Chirlaque, Miguel Rodríguez-Barranco, Antonio Agudo, Marc  
482       Gunter, Laure Dossus, Vittorio Krogh, Giuseppe Matullo, Antonia Trichopoulou, Ruth C.  
483       Travis, Federico Canzian, and Rudolf Kaaks. 2018. Mitochondrial DNA copy number variation,  
484       leukocyte telomere length, and breast cancer risk in the European Prospective Investigation into  
485       Cancer and Nutrition (EPIC) study. *Breast Cancer Res* 20 (1):29. DOI: [http://10.1186/s13058-](http://10.1186/s13058-018-0955-5)  
486       [018-0955-5](http://10.1186/s13058-018-0955-5), PMID: 29665866.
- 487   Carew, Jennifer S., and Peng Huang. 2002. Mitochondrial defects in cancer. *Molecular cancer* 1:9. DOI:  
488       <http://10.1186/1476-4598-1-9>, PMID: 12513701.
- 489   Castellani, Christina A., Ryan J. Longchamps, Jason A. Sumpter, Charles E. Newcomb, John A. Lane,  
490       Megan L. Grove, Jan Bressler, Jennifer A. Brody, James S. Floyd, Traci M. Bartz, Kent D.  
491       Taylor, Penglong Wang, Adrienne Tin, Josef Coresh, James S. Pankow, Myriam Fornage, Eliseo  
492       Guallar, Brian O'Rourke, Nathan Pankratz, Chunyu Liu, Daniel Levy, Nona Sotoodehnia, Eric  
493       Boerwinkle, and Dan E. Arking. 2020. Mitochondrial DNA copy number can influence mortality  
494       and cardiovascular disease via methylation of nuclear DNA CpGs. *Genome medicine* 12 (1):84.  
495       DOI: <http://10.1186/s13073-020-00778-7>, PMID: 32988399.
- 496   Chan, David C. 2020. Mitochondrial Dynamics and Its Involvement in Disease. *Annual review of*  
497       *pathology* 15:235-259. DOI: <http://10.1146/annurev-pathmechdis-012419-032711>, PMID:  
498       31585519.
- 499   Codipilly, Don C., Yi Qin, Sanford M. Dawsey, John Kisiel, Mark Topazian, David Ahlquist, and Prasad  
500       G. Iyer. 2018. Screening for esophageal squamous cell carcinoma: recent advances.  
501       *Gastrointestinal endoscopy* 88 (3):413-426. DOI: <http://10.1016/j.gie.2018.04.2352>, PMID:  
502       29709526.
- 503   Delsite, Robert L., Lene Juel Rasmussen, Anne Karin Rasmussen, Amanda Kalen, Prabhat C. Goswami,  
504       and Keshav K. Singh. 2003. Mitochondrial impairment is accompanied by impaired oxidative  
505       DNA repair in the nucleus. *Mutagenesis* 18 (6):497-503. DOI: <http://10.1093/mutage/geg027>,  
506       PMID: 14614184.
- 507   Dizdaroglu, Miral. 2015. Oxidatively induced DNA damage and its repair in cancer. *Mutation research.*  
508       *Reviews in mutation research* 763:212-245. DOI: <http://10.1016/j.mrrev.2014.11.002>, PMID:  
509       25795122.
- 510   Gao, Jinhang, Shilei Wen, Hongying Zhou, and Shi Feng. 2015. De-methylation of displacement loop of  
511       mitochondrial DNA is associated with increased mitochondrial copy number and nicotinamide  
512       adenine dinucleotide subunit 2 expression in colorectal cancer. *Molecular medicine reports* 12  
513       (5):7033-7038. DOI: <http://10.3892/mmr.2015.4256>, PMID: 26323487.

- 514 Greten, Florian R., Lars Eckmann, Tim F. Greten, Jin Mo Park, Zhi-Wei Li, Laurence J. Egan, Martin F.  
515 Kagnoff, and Michael Karin. 2004. IKKbeta links inflammation and tumorigenesis in a mouse  
516 model of colitis-associated cancer. *Cell* 118 (3):285-296. DOI: <http://10.1016/j.cell.2004.07.013>,  
517 PMID: 15294155.
- 518 Guo, Cheng, Xiaofen Li, Rong Wang, Jiekai Yu, Minfeng Ye, Lingna Mao, Suzhan Zhang, and Shu  
519 Zheng. 2016. Association between oxidative DNA damage and risk of colorectal cancer:  
520 Sensitive determination of urinary 8-hydroxy-2'-deoxyguanosine by uplc-ms/ms analysis.  
521 *Scientific reports* 6:32581. DOI: <http://10.1038/srep32581>, PMID: 27585556.
- 522 Haghshenas, Mohammad Reza, Seyed Vahid Hosseini, Mahmoud Mahmoudi, Mehdi Saberi-Firozi,  
523 Shirin Farjadian, and Abbas Ghaderi. 2009. IL-18 serum level and IL-18 promoter gene  
524 polymorphism in Iranian patients with gastrointestinal cancers. *Journal of gastroenterology and*  
525 *hepatology* 24 (6):1119-1122. DOI: <http://10.1111/j.1440-1746.2009.05791.x>, PMID: 19638090.
- 526 He, Yonggang, Yilei Gong, Jian Gu, J. Jack Lee, Scott M. Lippman, and Xifeng Wu. 2014. Increased  
527 leukocyte mitochondrial DNA copy number is associated with oral premalignant lesions: an  
528 epidemiology study. *Carcinogenesis* 35 (8):1760-1764. DOI: <http://10.1093/carcin/bgu093>,  
529 PMID: 24743515.
- 530 Hu, Qiongyuan, Huajian Ren, Jianan Ren, Qinjie Liu, Jie Wu, Xiuwen Wu, Guanwei Li, Gefei Wang,  
531 Guosheng Gu, Kun Guo, Zhiwu Hong, Song Liu, and Jieshou Li. 2018. Released Mitochondrial  
532 DNA Following Intestinal Ischemia Reperfusion Induces the Inflammatory Response and Gut  
533 Barrier Dysfunction. *Scientific reports* 8 (1):7350. DOI: <http://10.1038/s41598-018-25387-8>,  
534 PMID: 29743484.
- 535 Huang, Bo, Yu-Tang Gao, Xiao-Ou Shu, Wanqing Wen, Gong Yang, Guoliang Li, Regina Courtney, Bu-  
536 Tian Ji, Hong-Lan Li, Mark P. Purdue, Wei Zheng, and Qiuyin Cai. 2014. Association of  
537 leukocyte mitochondrial DNA copy number with colorectal cancer risk: Results from the  
538 Shanghai Women's Health Study. *Cancer Epidem Biomar Prev* 23 (11):2357-2365. DOI:  
539 <http://10.1158/1055-9965.EPI-14-0297>, PMID: 25139937.
- 540 Idelchik, María Del Pilar Sosa, Ulrike Begley, Thomas J. Begley, and J. Andrés Melendez. 2017.  
541 Mitochondrial ROS control of cancer. *Seminars in cancer biology* 47:57-66. DOI:  
542 <http://10.1016/j.semcancer.2017.04.005>, PMID: 28445781.
- 543 Janssen, Bram G., Elke Munters, Nicky Pieters, Karen Smeets, Bianca Cox, Ann Cuypers, Frans Fierens,  
544 Joris Penders, Jaco Vangronsveld, Wilfried Gyselaers, and Tim S. Nawrot. 2012. Placental  
545 mitochondrial DNA content and particulate air pollution during in utero life. *Environmental*  
546 *health perspectives* 120 (9):1346-1352. DOI: <http://10.1289/ehp.1104458>, PMID: 22626541.
- 547 Kolb, Ryan, Guang-Hui Liu, Ann M. Janowski, Fayyaz S. Sutterwala, and Weizhou Zhang. 2014.  
548 Inflammasomes in cancer: a double-edged sword. *Protein & cell* 5 (1):12-20. DOI:  
549 <http://10.1007/s13238-013-0001-4>, PMID: 24474192.
- 550 Kumar, Bhupender, Zafar Iqbal Bhat, Savita Bansal, Sunil Saini, Afreen Naseem, Khushnuma Wahabi,  
551 Archana Burman, Geeta Trilok Kumar, Sundeep Singh Saluja, and M. Moshahid Alam Rizvi.  
552 2017. Association of mitochondrial copy number variation and T16189C polymorphism with  
553 colorectal cancer in North Indian population. *Tumour Biol* 39 (11):1010428317740296. DOI:  
554 <http://10.1177/1010428317740296>, PMID: 29182103.
- 555 Kumar, Shria, David C. Metz, Susan Ellenberg, David E. Kaplan, and David S. Goldberg. 2020. Risk  
556 Factors and Incidence of Gastric Cancer After Detection of Helicobacter pylori Infection: A

- 557 Large Cohort Study. *Gastroenterology* 158 (3):527-536.e7. DOI:  
558 <http://10.1053/j.gastro.2019.10.019>, PMID: 31654635.
- 559 Lee, H. C., P. H. Yin, C. Y. Lu, C. W. Chi, and Y. H. Wei. 2000. Increase of mitochondria and  
560 mitochondrial DNA in response to oxidative stress in human cells. *Biochem J* 348 Pt 2:425-432,  
561 PMID: 10816438.
- 562 Lee, Hsin-Chen, and Yau-Huei Wei. 2005. Mitochondrial biogenesis and mitochondrial DNA  
563 maintenance of mammalian cells under oxidative stress. *Int J Biochem Cell B* 37 (4):822-834.  
564 DOI: <http://10.1016/j.biocel.2004.09.010>, PMID: 15694841.
- 565 Liao, Linda M., Andrea Baccarelli, Xiao-Ou Shu, Yu-Tang Gao, Bu-Tian Ji, Gong Yang, Hong-Lan Li,  
566 Mirjam Hoxha, Laura Dioni, Nathaniel Rothman, Wei Zheng, and Wong-Ho Chow. 2011.  
567 Mitochondrial DNA copy number and risk of gastric cancer: a report from the Shanghai  
568 Women's Health Study. *Cancer epidemiology, biomarkers & prevention* 20 (9):1944-1949. DOI:  
569 <http://10.1158/1055-9965.EPI-11-0379>, PMID: 21784958.
- 570 Liguori, Ilaria, Gennaro Russo, Francesco Curcio, Giulia Bulli, Luisa Aran, David Della-Morte, Gaetano  
571 Gargiulo, Gianluca Testa, Francesco Cacciatore, Domenico Bonaduce, and Pasquale Abete.  
572 2018. Oxidative stress, aging, and diseases. *Clinical interventions in aging* 13:757-772. DOI:  
573 <http://10.2147/CIA.S158513>, PMID: 29731617.
- 574 Lim, Sang Woo, Hye Ran Kim, Hwan Young Kim, Jung Wook Huh, Young Jin Kim, Jong Hee Shin,  
575 Soon Pal Suh, Dong Wook Ryang, Hyeong Rok Kim, and Myung Geun Shin. 2012. High-  
576 frequency minisatellite instability of the mitochondrial genome in colorectal cancer tissue  
577 associated with clinicopathological values. *International journal of cancer* 131 (6):1332-1341.  
578 DOI: <http://10.1002/ijc.27375>, PMID: 22120612.
- 579 Lin, Michael T., and M. Flint Beal. 2006. Mitochondrial dysfunction and oxidative stress in  
580 neurodegenerative diseases. *Nature* 443 (7113):787-795. DOI: <http://10.1038/nature05292>,  
581 PMID: 17051205.
- 582 Liu, Chin-San, Ching-Shan Tsai, Chen-Ling Kuo, Haw-Wen Chen, Chong-Kuei Lii, Yi-Shing Ma, and  
583 Yau-Huei Wei. 2003. Oxidative stress-related alteration of the copy number of mitochondrial  
584 DNA in human leukocytes. *Free radical research* 37 (12):1307-1317. DOI:  
585 <http://10.1080/10715760310001621342>, PMID: 14753755.
- 586 Ma, Yongsheng, Lin Zhang, Shengzhong Rong, Hongyan Qu, Yannan Zhang, Dong Chang, Hongzhi  
587 Pan, and Wenbo Wang. 2013. Relation between gastric cancer and protein oxidation, DNA  
588 damage, and lipid peroxidation. *Oxidative medicine and cellular longevity* 2013:543760. DOI:  
589 <http://10.1155/2013/543760>, PMID: 24454985.
- 590 McCormack, V. A., D. Menya, M. O. Munishi, C. Dzamalala, N. Gasmelseed, M. Leon Roux, M. Assefa,  
591 O. Osano, M. Watts, A. O. Mwasamwaja, B. T. Mmbaga, G. Murphy, C. C. Abnet, S. M.  
592 Dawsey, and J. Schüz. 2017. Informing etiologic research priorities for squamous cell  
593 esophageal cancer in Africa: A review of setting-specific exposures to known and putative risk  
594 factors. *International journal of cancer* 140 (2):259-271. DOI: <http://10.1002/ijc.30292>, PMID:  
595 27466161.
- 596 Mishra, Prashant, and David C. Chan. 2016. Metabolic regulation of mitochondrial dynamics. *J Cell Biol*  
597 212 (4):379-387. DOI: <http://10.1083/jcb.201511036>, PMID: 26858267.
- 598 Nunnari, Jodi, and Anu Suomalainen. 2012. Mitochondria: in sickness and in health. *Cell* 148 (6):1145-  
599 1159. DOI: <http://10.1016/j.cell.2012.02.035>, PMID: 22424226.

- 600 Parajuli, Ranjan, Eivind Bjerkaas, Aage Tverdal, Randi Selmer, Loïc Le Marchand, Elisabete  
601 Weiderpass, and Inger T. Gram. 2013. The increased risk of colon cancer due to cigarette  
602 smoking may be greater in women than men. *Cancer Epidemiol Biomarkers Prev* 22 (5):862-  
603 871. DOI: <http://10.1158/1055-9965.EPI-12-1351>, PMID: 23632818.
- 604 Parkash, Jai, Quentin Felty, and Deodutta Roy. 2006. Estrogen Exerts a Spatial and Temporal Influence  
605 on Reactive Oxygen Species Generation that Precedes Calcium Uptake in High-Capacity  
606 Mitochondria: Implications for Rapid Nongenomic Signaling of Cell Growth. *Biochemistry* 45  
607 (9):2872-2881. DOI: <http://10.1021/bi051855x>, PMID: 16503642.
- 608 Pikarsky, Eli, Rinnat M. Porat, Ilan Stein, Rinat Abramovitch, Sharon Amit, Shafika Kasem, Elena  
609 Gutkovich-Pyest, Simcha Urieli-Shoval, Eithan Galun, and Yinon Ben-Neriah. 2004. NF-  
610 kappaB functions as a tumour promoter in inflammation-associated cancer. *Nature* 431  
611 (7007):461-466. DOI: <http://10.1038/nature02924>, PMID: 15329734.
- 612 Pritchett, Natalie R., Marlena Maziarz, Xiao-Ou Shu, Farin Kamangar, Sanford M. Dawsey, Jin-Hu Fan,  
613 Bu-Tian Ji, Yu-Tang Gao, Yong-Bing Xiang, You-Lin Qiao, Honglan Li, Gong Yang, Shao-  
614 Ming Wang, Frank Z. Stanczyk, Wong-Ho Chow, Hormuzd A. Katki, Wei Zheng, Qing Lan,  
615 Neal D. Freedman, Nat Rothman, Christian C. Abnet, and Gwen Murphy. 2020. Serum ghrelin  
616 and esophageal and gastric cancer in two cohorts in China. *International journal of cancer* 146  
617 (10):2728-2735. DOI: <http://10.1002/ijc.32597>, PMID: 31351006.
- 618 Qu, Falin, Xiaonan Liu, Feng Zhou, Hushan Yang, Guoqiang Bao, Xianli He, and Jinliang Xing. 2011.  
619 Association between mitochondrial DNA content in leukocytes and colorectal cancer risk: a  
620 case-control analysis. *Cancer* 117 (14):3148-3155. DOI: <http://10.1002/cncr.25906>, PMID:  
621 21246538.
- 622 Shalapur, Shabnam, and Michael Karin. 2020. Cruel to Be Kind: Epithelial, Microbial, and Immune Cell  
623 Interactions in Gastrointestinal Cancers. *Annual review of immunology* 38:649-671. DOI:  
624 <http://10.1146/annurev-immunol-082019-081656>, PMID: 32040356.
- 625 Shen, Jie, Jie Wan, Renduo Song, and Hua Zhao. 2015. Peripheral blood mitochondrial DNA copy  
626 number, length heteroplasmy and breast cancer risk: a replication study. *Carcinogenesis* 36  
627 (11):1307-1313. DOI: <http://10.1093/carcin/bgv130>, PMID: 26363030.
- 628 Shimada, Kenichi, Timothy R. Crother, Justin Karlin, Jargalsaikhan Dagvadorj, Norika Chiba, Shuang  
629 Chen, V. Krishnan Ramanujan, Andrea J. Wolf, Laurent Vergnes, David M. Ojcius, Altan  
630 Rentsendorj, Mario Vargas, Candace Guerrero, Yinsheng Wang, Katherine A. Fitzgerald, David  
631 M. Underhill, Terrence Town, and Moshe Arditi. 2012. Oxidized mitochondrial DNA activates  
632 the NLRP3 inflammasome during apoptosis. *Immunity* 36 (3):401-414. DOI:  
633 <http://10.1016/j.immuni.2012.01.009>, PMID: 22342844.
- 634 Shokolenko, Inna, Natalia Venediktova, Alexandra Bochkareva, Glenn L. Wilson, and Mikhail F.  
635 Alexeyev. 2009. Oxidative stress induces degradation of mitochondrial DNA. *Nucleic acids*  
636 *research* 37 (8):2539-2548. DOI: <http://10.1093/nar/gkp100>, PMID: 19264794.
- 637 Smyth, Elizabeth C., Magnus Nilsson, Heike I. Grabsch, Nicole Ct van Grieken, and Florian Lordick.  
638 2020. Gastric cancer. *Lancet* 396 (10251):635-648. DOI: [http://10.1016/S0140-6736\(20\)31288-](http://10.1016/S0140-6736(20)31288-5)  
639 [5](http://10.1016/S0140-6736(20)31288-5), PMID: 32861308.
- 640 Sun, Yuhui, Jian Gu, Jaffer A. Ajani, David W. Chang, Xifeng Wu, and John R. Stroehlein. 2014.  
641 Genetic and intermediate phenotypic susceptibility markers of gastric cancer in Hispanic  
642 Americans: a case-control study. *Cancer* 120 (19):3040-3048. DOI: <http://10.1002/cncr.28792>,  
643 PMID: 24962126.



- 644 Sun, Yuhui, Liren Zhang, Simon S. Ho, Xifeng Wu, and Jian Gu. 2016. Lower mitochondrial DNA copy  
645 number in peripheral blood leukocytes increases the risk of endometrial cancer. *Molecular*  
646 *carcinogenesis* 55 (6):1111-1117. DOI: <http://10.1002/mc.22373>, PMID: 26258624.
- 647 Sung, Hyuna, Jacques Ferlay, Rebecca L. Siegel, Mathieu Laversanne, Isabelle Soerjomataram, Ahmedin  
648 Jemal, and Freddie Bray. 2021. Global Cancer Statistics 2020: GLOBOCAN Estimates of  
649 Incidence and Mortality Worldwide for 36 Cancers in 185 Countries. *CA: a cancer journal for*  
650 *clinicians* 71 (3):209-249. DOI: <http://10.3322/caac.21660>, PMID: 33538338.
- 651 Thyagarajan, Bharat, Renwei Wang, Helene Barcelo, Woon-Puay Koh, and Jian-Min Yuan. 2012.  
652 Mitochondrial copy number is associated with colorectal cancer risk. *Cancer epidemiology,*  
653 *biomarkers & prevention* 21 (9):1574-1581. DOI: <http://10.1158/1055-9965.EPI-12-0138-T>,  
654 PMID: 22787200.
- 655 Wang, Feng, Jiang Zhu, Ping Yao, Xiulou Li, Meian He, Yuewei Liu, Jing Yuan, Weihong Chen, Li  
656 Zhou, Xinwen Min, Weimin Fang, Yuan Liang, Youjie Wang, Sheng Wei, Jichun Liu, Xiaoping  
657 Miao, Mingjian Lang, Xixiang Jiang, Peng Zhang, Dongfeng Li, Chuanwen Lu, Xiaozheng  
658 Wang, Wenhui Shi, Jianru Zheng, Huan Guo, Xiaomin Zhang, Handong Yang, Frank B. Hu, and  
659 Tangchun Wu. 2013. Cohort Profile: the Dongfeng-Tongji cohort study of retired workers.  
660 *International journal of epidemiology* 42 (3):731-740. DOI: <http://10.1093/ije/dys053>, PMID:  
661 22531126.
- 662 Wang, Lihua, Hong Lv, Pei Ji, Xun Zhu, Hua Yuan, Guangfu Jin, Juncheng Dai, Zhibin Hu, Yuxiong Su,  
663 and Hongxia Ma. 2018. Mitochondrial DNA copy number is associated with risk of head and  
664 neck squamous cell carcinoma in Chinese population. *Cancer medicine* 7 (6):2776-2782. DOI:  
665 <http://10.1002/cam4.1452>, PMID: 29673117.
- 666 Wu, I. Chien, Cheng-Chieh Lin, Chin-San Liu, Chih-Cheng Hsu, Ching-Yu Chen, and Chao A. Hsiung.  
667 2017. Interrelations Between Mitochondrial DNA Copy Number and Inflammation in Older  
668 Adults. *J Gerontol A-Biol* 72 (7):937-944. DOI: <http://10.1093/gerona/glx033>, PMID: 28329339.
- 669 Xu, Enping, Wenjie Sun, Jian Gu, Wong-Ho Chow, Jaffer A. Ajani, and Xifeng Wu. 2013. Association of  
670 mitochondrial DNA copy number in peripheral blood leukocytes with risk of esophageal  
671 adenocarcinoma. *Carcinogenesis* 34 (11):2521-2524. DOI: <http://10.1093/carcin/bgt230>, PMID:  
672 23803692.
- 673 Xu, Junfeng, Wen-Shin Chang, Chia-Wen Tsai, Da-Tian Bau, John W. Davis, Timothy C. Thompson,  
674 Christopher J. Logothetis, and Jian Gu. 2020. Mitochondrial DNA copy number in peripheral  
675 blood leukocytes is associated with biochemical recurrence in prostate cancer patients in African  
676 Americans. *Carcinogenesis* 41 (3):267-273. DOI: <http://10.1093/carcin/bgz139>, PMID:  
677 31408512.
- 678 Yang, Keming, Xin Li, Michele R. Forman, Patrick O. Monahan, Bret H. Graham, Amit Joshi, Mingyang  
679 Song, Dong Hang, Shuji Ogino, Edward L. Giovannucci, Immaculata De Vivo, Andrew T.  
680 Chan, and Hongmei Nan. 2019. Pre-diagnostic leukocyte mitochondrial DNA copy number and  
681 colorectal cancer risk. *Carcinogenesis* 40 (12):1462-1468. DOI: <http://10.1093/carcin/bgz159>,  
682 PMID: 31556446.
- 683 Zhang, Xing, Meng Li, Shuntai Chen, Jiaqi Hu, Qiujun Guo, Rui Liu, Honggang Zheng, Zhichao Jin,  
684 Yuan Yuan, Yupeng Xi, and Baojin Hua. 2018. Endoscopic Screening in Asian Countries Is  
685 Associated With Reduced Gastric Cancer Mortality: A Meta-analysis and Systematic Review.  
686 *Gastroenterology* 155 (2):347-354.e9. DOI: <http://10.1053/j.gastro.2018.04.026>, PMID:  
687 29723507.

- 688 Zheng, Jian, Ning-Hua Cui, Shuai Zhang, Xue-Bin Wang, and Liang Ming. 2019. Leukocyte  
689 Mitochondrial DNA Copy Number and Risk of Thyroid Cancer: A Two-Stage Case-Control  
690 Study. *Front Endocrinol* 10:421. DOI: <http://10.3389/fendo.2019.00421>, PMID: 31312182.  
691 Zhong, Fei, Shuang Liang, and Zhenyu Zhong. 2019. Emerging Role of Mitochondrial DNA as a Major  
692 Driver of Inflammation and Disease Progression. *Trends in immunology* 40 (12):1120-1133.  
693 DOI: <http://10.1016/j.it.2019.10.008>, PMID: 31744765.  
694 Zhu, Xun, Yingying Mao, Tongtong Huang, Caiwang Yan, Fei Yu, Jiangbo Du, Juncheng Dai, Hongxia  
695 Ma, and Guangfu Jin. 2017. High mitochondrial DNA copy number was associated with an  
696 increased gastric cancer risk in a Chinese population. *Molecular carcinogenesis* 56 (12):2593-  
697 2600. DOI: <http://10.1002/mc.22703>, PMID: 28688194.  
698



**Table 1.** Baseline characteristics of subcohort participants and incident GICs cases.

| Characteristics <sup>a</sup>  | Base cohort  | Subcohort         | Incident cases    |                    |                   | Total GICs <sup>b</sup> |
|-------------------------------|--------------|-------------------|-------------------|--------------------|-------------------|-------------------------|
|                               |              |                   | CRC               | GC                 | EC                |                         |
| Number of subjects            | 21658        | 1173              | 278               | 138                | 72                | 488                     |
| Age at enrollment, years      | 63.2 ± 7.5   | 63.4 ± 7.7        | 67.2 ± 7.2**      | 65.8 ± 7.5**       | 65.7 ± 6.9*       | 66.5 ± 7.3**            |
| Males                         | 9653 (44.6)  | 518 (44.2)        | 162 (58.3)**      | 83 (60.1)**        | 55 (76.4)**       | 300 (61.5)**            |
| BMI, kg/m <sup>2</sup>        | 24.5 ± 3.3   | 24.5 ± 3.2        | 24.9 ± 3.4        | 24.3 ± 3.3         | 23.7 ± 3.4*       | 24.6 ± 3.4              |
| Education                     |              |                   |                   |                    |                   |                         |
| Primary school or below       | 6458 (29.8)  | 331 (28.2)        | 100 (36.0)*       | 54 (39.1)*         | 25 (34.7)         | 179 (36.7)**            |
| Middle school                 | 7943 (36.7)  | 443 (37.8)        | 97 (34.9)         | 44 (31.9)          | 28 (38.9)         | 169 (34.6)              |
| High school or beyond         | 7257 (33.5)  | 399 (34.0)        | 81 (29.1)         | 40 (29)            | 19 (26.4)         | 140 (28.7)              |
| Smoking status                |              |                   |                   |                    |                   |                         |
| Never                         | 15296 (70.6) | 840 (71.6)        | 174 (62.6)*       | 78 (56.5)**        | 27 (37.5)**       | 279 (57.2)**            |
| Former                        | 2469 (11.4)  | 126 (10.7)        | 39 (14.0)         | 27 (19.6)          | 16 (22.2)         | 82 (16.8)               |
| Current                       | 3893 (18.0)  | 207 (17.7)        | 65 (23.4)         | 33 (23.9)          | 29 (40.3)         | 127 (26)                |
| Alcohol drinking status       |              |                   |                   |                    |                   |                         |
| Never                         | 15796 (72.9) | 857 (73.0)        | 201 (72.3)        | 89 (64.5)          | 35 (48.6)**       | 325 (66.6)*             |
| Former                        | 1167 (5.4)   | 77 (6.6)          | 22 (7.9)          | 10 (7.2)           | 5 (6.9)           | 37 (7.6)                |
| Current                       | 4695 (21.7)  | 239 (20.4)        | 55 (19.8)         | 39 (28.3)          | 32 (44.4)         | 126 (25.8)              |
| Physical activity, yes        | 19286 (89.0) | 1061 (90.5)       | 251 (90.3)        | 117 (84.8)*        | 62 (86.1)         | 430 (88.1)              |
| Family history of cancer, yes | 793 (3.7)    | 37 (3.2)          | 8 (2.9)           | 2 (1.4)            | 2 (2.8)           | 12 (2.5)                |
| Blood mtDNAcn                 | -            | 0.93 (0.77, 1.15) | 1.01 (0.71, 1.35) | 1.00 (0.78, 1.41)* | 0.96 (0.77, 1.39) | 1.00 (0.73, 1.37)**     |

**Abbreviations:** BMI, body mass index; mtDNAcn, mitochondrial DNA copy number; CRC, colorectal cancer; GC, gastric cancer; EC, esophageal cancer; GICs, gastrointestinal cancers.

**Notes:** Comparisons were made between incident cancer cases and non-case controls in the subcohort. In particular, when analyses were performed as for one specific type of cancer, cases of the remaining cancer types were treated as controls.

*P* values were derived from Student's *t*-test, Mann-Whitney *U* test, or Pearson's  $\chi^2$  test. \*0.01 < *P* < 0.05; \*\**P* < 0.01.

<sup>a</sup>Data were presented as mean ± SD, n (%), or median (25<sup>th</sup>, 75<sup>th</sup>). <sup>b</sup>Total GICs includes CRC, GC, and EC.

**Table 2.** Associations of blood mtDNAcn with incident risks of GICs.

| Incident GICs                                                               | Quartiles of blood mtDNAcn <sup>a</sup> |           |                   |                   |
|-----------------------------------------------------------------------------|-----------------------------------------|-----------|-------------------|-------------------|
|                                                                             | Q1                                      | Q2        | Q3                | Q4                |
| <b>CRC</b>                                                                  |                                         |           |                   |                   |
| <i>All subjects</i>                                                         |                                         |           |                   |                   |
| No. of cases / subcohort                                                    | 83 / 295                                | 37 / 292  | 56 / 292          | 102 / 294         |
| HR (95% CI) <sup>b</sup>                                                    | 2.27 (1.47, 3.52)                       | reference | 1.65 (1.04, 2.62) | 2.81 (1.85, 4.28) |
| <i>Excluding subjects who diagnosed during first two years of follow-up</i> |                                         |           |                   |                   |
| No. of cases / subcohort                                                    | 73 / 295                                | 37 / 292  | 50 / 292          | 89 / 294          |
| HR (95% CI) <sup>b</sup>                                                    | 2.00 (1.28, 3.12)                       | reference | 1.47 (0.92, 2.35) | 2.47 (1.61, 3.78) |
| <i>Excluding other incident cancer cases</i>                                |                                         |           |                   |                   |
| No. of cases / subcohort                                                    | 83 / 272                                | 37 / 280  | 56 / 277          | 102 / 263         |
| HR (95% CI) <sup>b</sup>                                                    | 2.31 (1.49, 3.59)                       | reference | 1.69 (1.07, 2.69) | 2.95 (1.93, 4.51) |
| <b>GC</b>                                                                   |                                         |           |                   |                   |
| <i>All subjects</i>                                                         |                                         |           |                   |                   |
| No. of cases / subcohort                                                    | 32 / 295                                | 26 / 292  | 26 / 292          | 54 / 294          |
| HR (95% CI) <sup>b</sup>                                                    | 1.28 (0.73, 2.24)                       | reference | 1.10 (0.61, 1.97) | 2.16 (1.31, 3.54) |
| <i>Excluding subjects who diagnosed during first two years of follow-up</i> |                                         |           |                   |                   |
| No. of cases / subcohort                                                    | 29 / 295                                | 23 / 292  | 23 / 292          | 46 / 294          |
| HR (95% CI) <sup>b</sup>                                                    | 1.33 (0.73, 2.40)                       | reference | 1.11 (0.60, 2.06) | 2.10 (1.24, 3.56) |
| <i>Excluding other incident cancer cases</i>                                |                                         |           |                   |                   |
| No. of cases / subcohort                                                    | 32 / 267                                | 26 / 281  | 26 / 274          | 54 / 262          |
| HR (95% CI) <sup>b</sup>                                                    | 1.32 (0.75, 2.32)                       | reference | 1.15 (0.64, 2.06) | 2.30 (1.40, 3.80) |
| <b>EC</b>                                                                   |                                         |           |                   |                   |
| <i>All subjects</i>                                                         |                                         |           |                   |                   |
| No. of cases / subcohort                                                    | 18 / 295                                | 11 / 292  | 18 / 292          | 25 / 294          |
| HR (95% CI) <sup>b</sup>                                                    | 1.75 (0.80, 3.85)                       | reference | 1.82 (0.82, 4.04) | 2.38 (1.13, 5.02) |
| <i>Excluding subjects who diagnosed during first two years of follow-up</i> |                                         |           |                   |                   |
| No. of cases / subcohort                                                    | 14 / 295                                | 11 / 292  | 14 / 292          | 22 / 294          |
| HR (95% CI) <sup>b</sup>                                                    | 1.36 (0.59, 3.13)                       | reference | 1.46 (0.62, 3.42) | 2.13 (0.99, 4.57) |
| <i>Excluding other incident cancer cases</i>                                |                                         |           |                   |                   |
| No. of cases / subcohort                                                    | 18 / 268                                | 11 / 278  | 18 / 275          | 25 / 262          |
| HR (95% CI) <sup>b</sup>                                                    | 1.75 (0.80, 3.86)                       | reference | 1.88 (0.84, 4.22) | 2.57 (1.22, 5.45) |
| <b>Total GICs</b>                                                           |                                         |           |                   |                   |
| <i>All subjects</i>                                                         |                                         |           |                   |                   |
| No. of cases / subcohort                                                    | 133 / 295                               | 74 / 292  | 100 / 292         | 181 / 294         |
| HR (95% CI) <sup>b</sup>                                                    | 1.84 (1.30, 2.60)                       | reference | 1.47 (1.03, 2.10) | 2.51 (1.82, 3.47) |
| <i>Excluding subjects who diagnosed during first two years of follow-up</i> |                                         |           |                   |                   |
| No. of cases / subcohort                                                    | 116 / 295                               | 71 / 292  | 87 / 292          | 157 / 294         |
| HR (95% CI) <sup>b</sup>                                                    | 1.68 (1.18, 2.40)                       | reference | 1.34 (0.93, 1.94) | 2.88 (1.64, 3.19) |
| <i>Excluding other incident cancer cases</i>                                |                                         |           |                   |                   |
| No. of cases / subcohort                                                    | 133 / 273                               | 74 / 283  | 100 / 278         | 81 / 269          |
| HR (95% CI) <sup>b</sup>                                                    | 1.89 (1.34, 2.68)                       | reference | 1.52 (1.06, 2.17) | 2.64 (1.90, 3.66) |

**Abbreviations:** HR, hazard ratio; CI, confidence interval; mtDNAcn, mitochondrial DNA copy number; CRC, colorectal cancer; GC, gastric cancer; EC, esophageal cancer; GICs, gastrointestinal cancers.

**Notes:** <sup>a</sup> Quartile groups were divided by sex-specific cut-off values of mtDNA<sub>cn</sub> among sub-cohort participants. For males: <0.722 (Q1), 0.722-0.887 (Q2), 0.888-1.110 (Q3), ≥1.11 (Q4); for females: <0.806 (Q1), 0.806-0.957 (Q2), 0.958-1.179 (Q3), ≥1.180 (Q4).

<sup>b</sup> Weighted Cox proportional hazards models, with adjustment for age, BMI, gender, smoking (smokers/never smokers), alcohol drinking (current/non-current alcohol drinkers), physical activity (yes/no), education status (primary school or below, middle school, high school or beyond), and family history of cancer.

## Figure legends

**Figure 1.** Case-cohort design nested within the DFTJ cohort.

**Abbreviations:** DFTJ, Dongfeng-tongji; CRC, colorectal cancer; GC, gastric cancer; EC, esophageal cancer; GICs, gastrointestinal cancers.

**Figure 2.** Associations of blood mtDNAcn with incident risks of GICs based on the restricted cubic spline function.

(A) Association between mtDNAcn and incident risk of CRC.

(B) Association between mtDNAcn and incident risk of GC.

(C) Association between mtDNAcn and incident risk of EC.

(D) Association between mtDNAcn and incident risk of total GICs.

**Abbreviations:** mtDNAcn, mitochondrial DNA copy number; CRC, colorectal cancer; GC, gastric cancer; EC, esophageal cancer; GICs, gastrointestinal cancers.

**Notes:** The three black solid dots represent the knots of 5<sup>th</sup>, 50<sup>th</sup> and 95<sup>th</sup> percentiles of log<sub>2</sub>-transformed mtDNAcn, while the separate median value of log<sub>2</sub>-transformed mtDNAcn was used as the reference.

**Figure 3.** Stratified analyses for the associations of blood mtDNAcn with CRC and total GICs risk by age, gender, and smoking status.

(A) Stratified by age; (B) Stratified by gender; (C) Stratified by smoking status.

**Abbreviations:** HR, hazard ratio; CI, confidence interval; mtDNAcn, mitochondrial DNA copy number; CRC, colorectal cancer; GC, gastric cancer; EC, esophageal cancer; GICs,

gastrointestinal cancers.

**Notes:** Weighted Cox proportional hazards models, with adjustments for age, BMI, gender, smoking status, alcohol drinking status, physical exercise, education status, and family history of cancer, except for the stratification variable. The pink solid square and green whisker line in panels represent hazard ratios (HRs) and 95% confidence intervals (CIs), respectively. The green arrow means that the 95%CI exceeds the limitation of axis and not shown in this figure.

**Figure 4.** Joint effects of blood mtDNAcn with age and smoking status on CRC and total GICs risks.

(A) Joint effect of mtDNAcn with age on CRC.

(B) Joint effect of mtDNAcn with smoking status on CRC.

(C) Joint effect of mtDNAcn with age on total GICs.

(D) Joint effect of mtDNAcn with smoking status on total GICs.

**Abbreviations:** HR, hazard ratio; CI, confidence intervals; mtDNAcn, mitochondrial DNA copy number; CRC, colorectal cancer; GICs, gastrointestinal cancers.

**Notes:** Weighted Cox proportional hazards models, with adjustments for age, BMI, gender, smoking status, alcohol drinking status, physical exercise, education status, and family history of cancer, except for variables in the combined terms.

STROBE Statement—Checklist of items that should be included in reports of *cohort studies*

|                           | <b>Item No</b> | <b>Recommendation</b>                                                                                                                                                                                                                                                                                                  | <b>Reported on</b>                                                              |
|---------------------------|----------------|------------------------------------------------------------------------------------------------------------------------------------------------------------------------------------------------------------------------------------------------------------------------------------------------------------------------|---------------------------------------------------------------------------------|
| <b>Title and abstract</b> | 1              | (a) Indicate the study's design with a commonly used term in the title or the abstract<br>(b) Provide in the abstract an informative and balanced summary of what was done and what was found                                                                                                                          | <b>Title and abstract</b>                                                       |
| <b>Introduction</b>       |                |                                                                                                                                                                                                                                                                                                                        |                                                                                 |
| Background/rationale      | 2              | Explain the scientific background and rationale for the investigation being reported                                                                                                                                                                                                                                   | <b>Introduction</b>                                                             |
| Objectives                | 3              | State specific objectives, including any prespecified hypotheses                                                                                                                                                                                                                                                       | <b>Introduction</b>                                                             |
| <b>Methods</b>            |                |                                                                                                                                                                                                                                                                                                                        |                                                                                 |
| Study design              | 4              | Present key elements of study design early in the paper                                                                                                                                                                                                                                                                | <b>Study population</b>                                                         |
| Setting                   | 5              | Describe the setting, locations, and relevant dates, including periods of recruitment, exposure, follow-up, and data collection                                                                                                                                                                                        | <b>Study population, Case-cohort study design and covariates assessment</b>     |
| Participants              | 6              | (a) Give the eligibility criteria, and the sources and methods of selection of participants. Describe methods of follow-up<br>(b) For matched studies, give matching criteria and number of exposed and unexposed                                                                                                      | <b>Study population, Case-cohort study design and covariates assessment</b>     |
| Variables                 | 7              | Clearly define all outcomes, exposures, predictors, potential confounders, and effect modifiers. Give diagnostic criteria, if applicable                                                                                                                                                                               | <b>Case-cohort study design and covariates assessment</b>                       |
| Data sources/measurement  | 8*             | For each variable of interest, give sources of data and details of methods of assessment (measurement). Describe comparability of assessment methods if there is more than one group                                                                                                                                   | <b>Materials and methods</b>                                                    |
| Bias                      | 9              | Describe any efforts to address potential sources of bias                                                                                                                                                                                                                                                              | <b>Materials and methods</b>                                                    |
| Study size                | 10             | Explain how the study size was arrived at                                                                                                                                                                                                                                                                              | <b>Materials and methods</b>                                                    |
| Quantitative variables    | 11             | Explain how quantitative variables were handled in the analyses. If applicable, describe which groupings were chosen and why                                                                                                                                                                                           | <b>Case-cohort study design and covariates assessment, statistical analysis</b> |
| Statistical methods       | 12             | (a) Describe all statistical methods, including those used to control for confounding<br>(b) Describe any methods used to examine subgroups and interactions<br>(c) Explain how missing data were addressed<br>(d) If applicable, explain how loss to follow-up was addressed<br>(e) Describe any sensitivity analyses | <b>Case-cohort study design and covariates assessment, statistical analysis</b> |
| <b>Results</b>            |                |                                                                                                                                                                                                                                                                                                                        |                                                                                 |
| Participants              | 13*            | (a) Report numbers of individuals at each stage of study—eg numbers potentially eligible, examined for eligibility, confirmed eligible, included in the study, completing follow-up, and analysed<br>(b) Give reasons for non-participation at each stage<br>(c) Consider use of a flow diagram                        | <b>General characteristics of study participants</b>                            |

|                          |     |                                                                                                                                                                                                                                                                                                                                                                                                               |                                                                                              |
|--------------------------|-----|---------------------------------------------------------------------------------------------------------------------------------------------------------------------------------------------------------------------------------------------------------------------------------------------------------------------------------------------------------------------------------------------------------------|----------------------------------------------------------------------------------------------|
| Descriptive data         | 14* | (a) Give characteristics of study participants (eg demographic, clinical, social) and information on exposures and potential confounders<br>(b) Indicate number of participants with missing data for each variable of interest<br>(c) Summarise follow-up time (eg, average and total amount)                                                                                                                | <b>General characteristics of study participants, Table 1, figure 1, table S1, figure S1</b> |
| Outcome data             | 15* | Report numbers of outcome events or summary measures over time                                                                                                                                                                                                                                                                                                                                                | <b>Table 2, figure 2, figure 3, figure 4, table S2, table S3</b>                             |
| Main results             | 16  | (a) Give unadjusted estimates and, if applicable, confounder-adjusted estimates and their precision (eg, 95% confidence interval). Make clear which confounders were adjusted for and why they were included<br>(b) Report category boundaries when continuous variables were categorized<br>(c) If relevant, consider translating estimates of relative risk into absolute risk for a meaningful time period | <b>Table 2, figure 2, figure 3, figure 4</b>                                                 |
| Other analyses           | 17  | Report other analyses done—eg analyses of subgroups and interactions, and sensitivity analyses                                                                                                                                                                                                                                                                                                                | <b>Table S2, table S3</b>                                                                    |
| <b>Discussion</b>        |     |                                                                                                                                                                                                                                                                                                                                                                                                               |                                                                                              |
| Key results              | 18  | Summarise key results with reference to study objectives                                                                                                                                                                                                                                                                                                                                                      | <b>Discussion</b>                                                                            |
| Limitations              | 19  | Discuss limitations of the study, taking into account sources of potential bias or imprecision. Discuss both direction and magnitude of any potential bias                                                                                                                                                                                                                                                    | <b>Discussion</b>                                                                            |
| Interpretation           | 20  | Give a cautious overall interpretation of results considering objectives, limitations, multiplicity of analyses, results from similar studies, and other relevant evidence                                                                                                                                                                                                                                    | <b>Discussion</b>                                                                            |
| Generalisability         | 21  | Discuss the generalisability (external validity) of the study results                                                                                                                                                                                                                                                                                                                                         | <b>Discussion</b>                                                                            |
| <b>Other information</b> |     |                                                                                                                                                                                                                                                                                                                                                                                                               |                                                                                              |
| Funding                  | 22  | Give the source of funding and the role of the funders for the present study and, if applicable, for the original study on which the present article is based                                                                                                                                                                                                                                                 | <b>Support statement</b>                                                                     |

\*Give information separately for exposed and unexposed groups.

**Note:** An Explanation and Elaboration article discusses each checklist item and gives methodological background and published examples of transparent reporting. The STROBE checklist is best used in conjunction with this article (freely available on the Web sites of PLoS Medicine at <http://www.plosmedicine.org/>, Annals of Internal Medicine at <http://www.annals.org/>, and Epidemiology at <http://www.epidem.com/>). Information on the STROBE Initiative is available at <http://www.strobe-statement.org>.

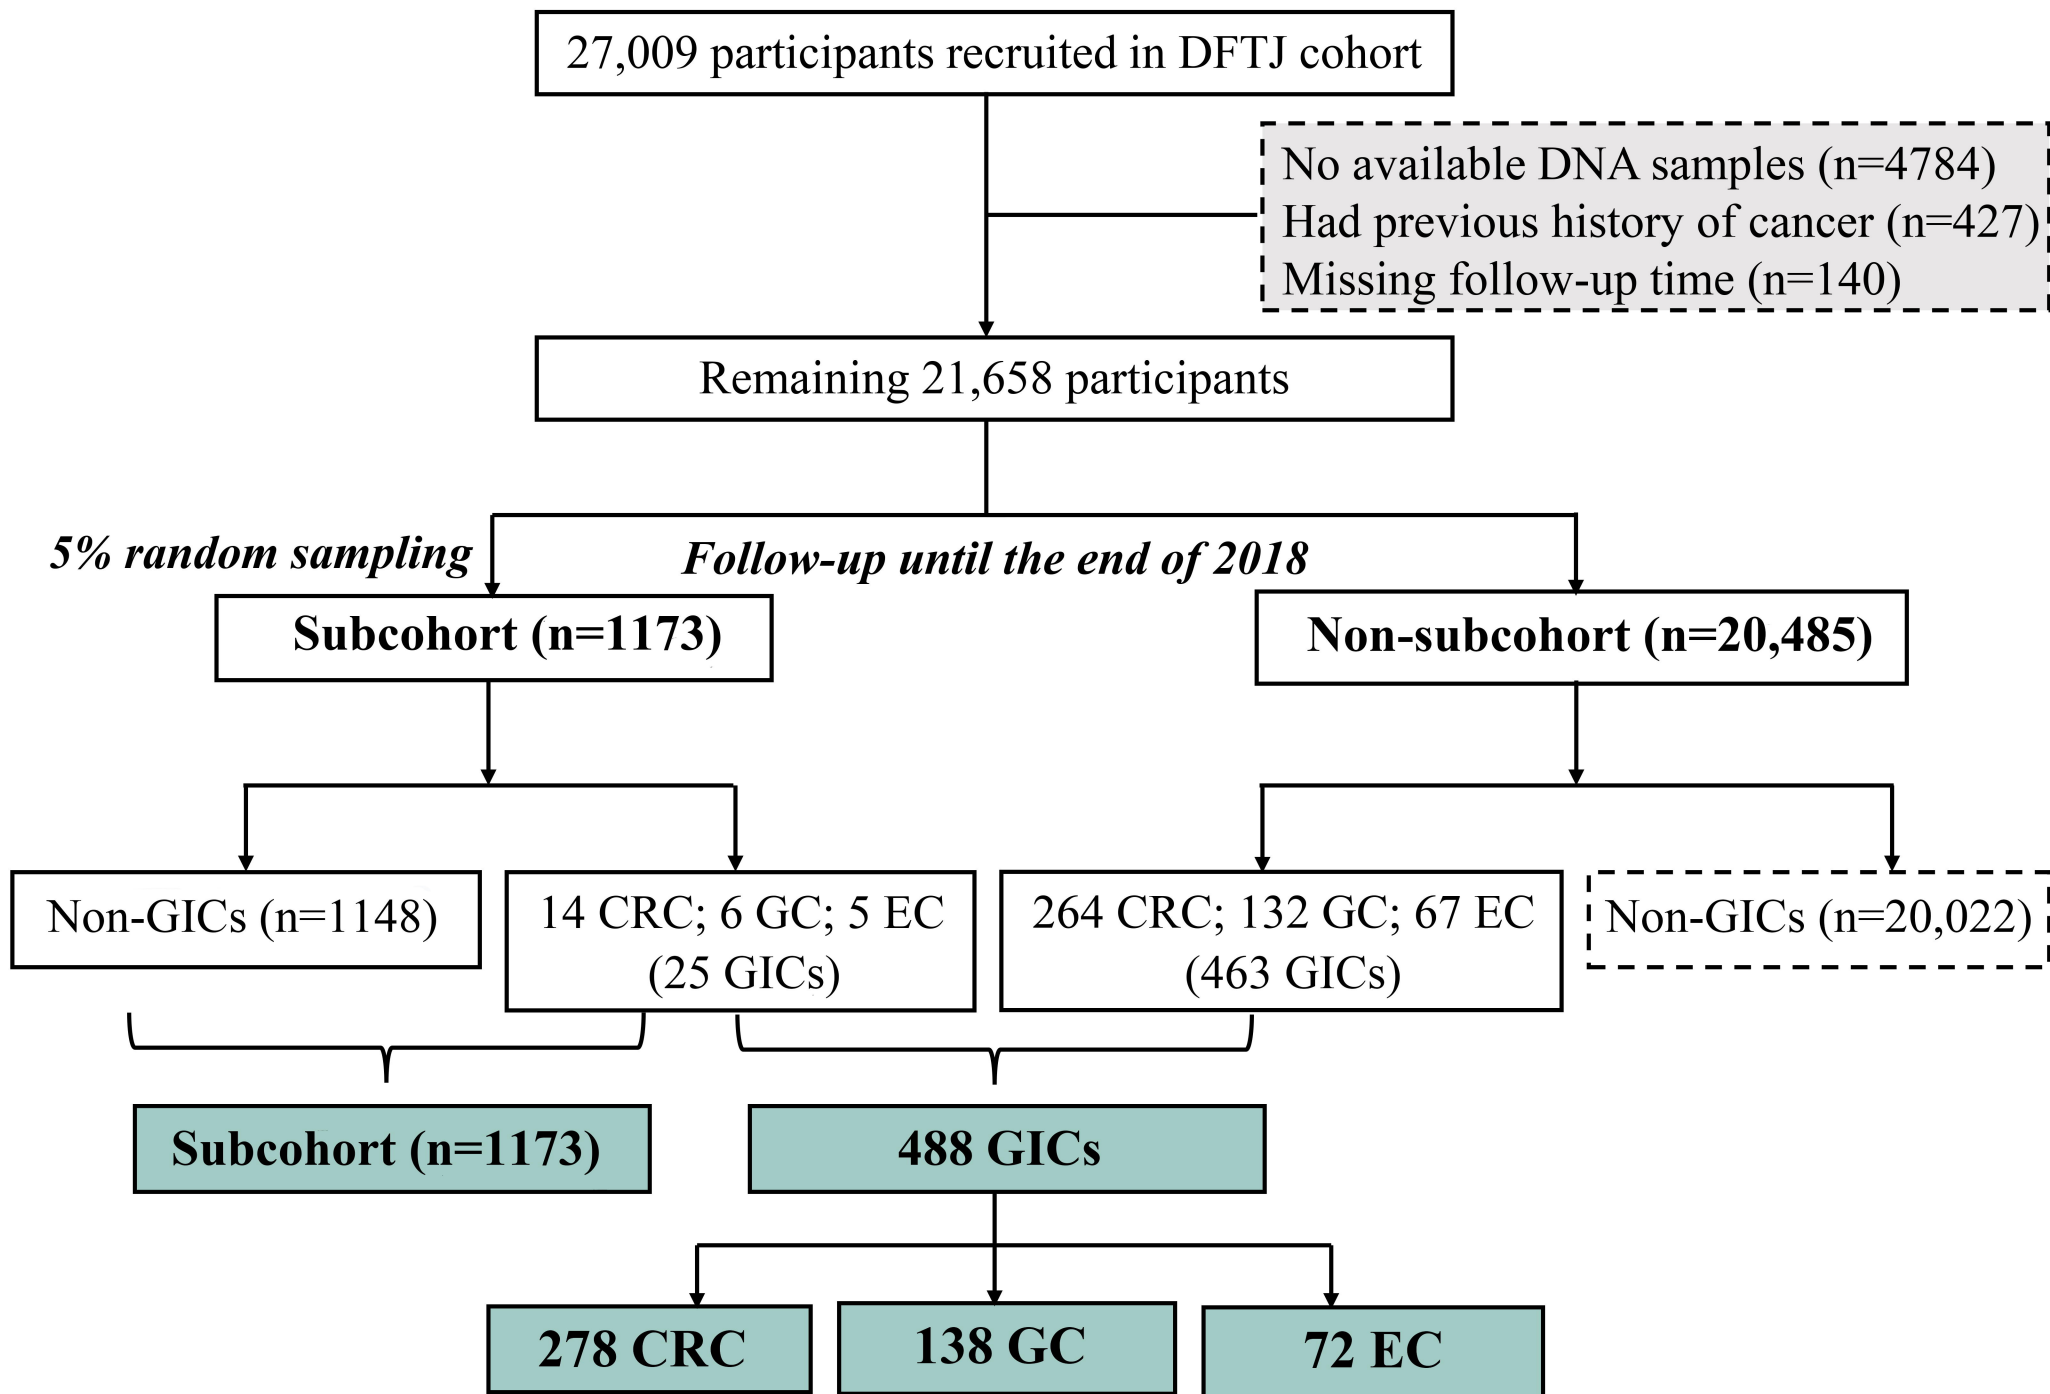



**A. CRC**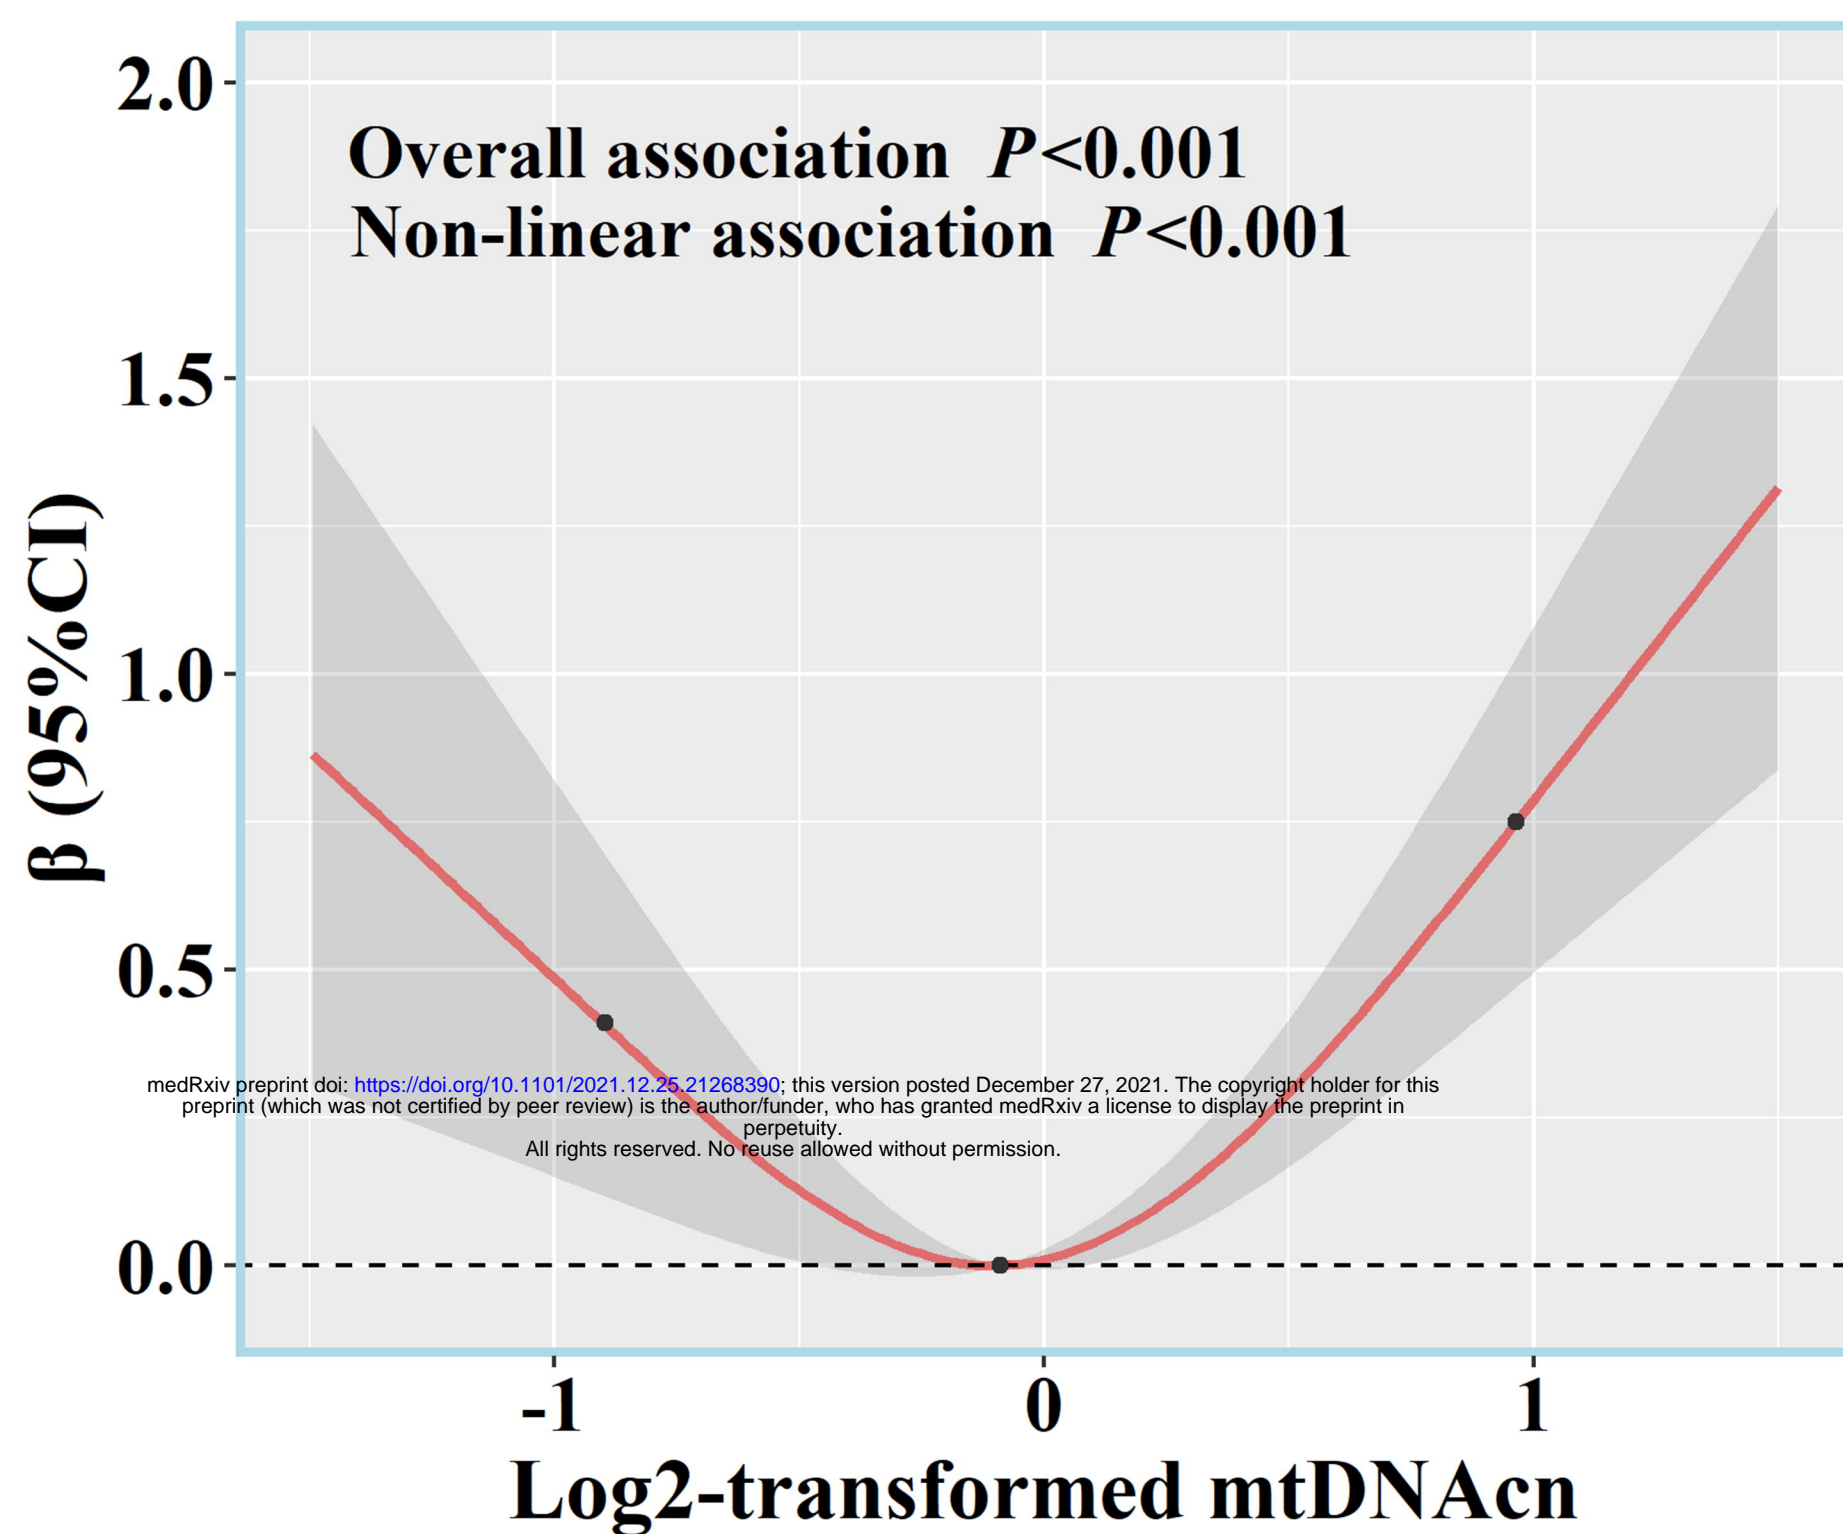**B. GC**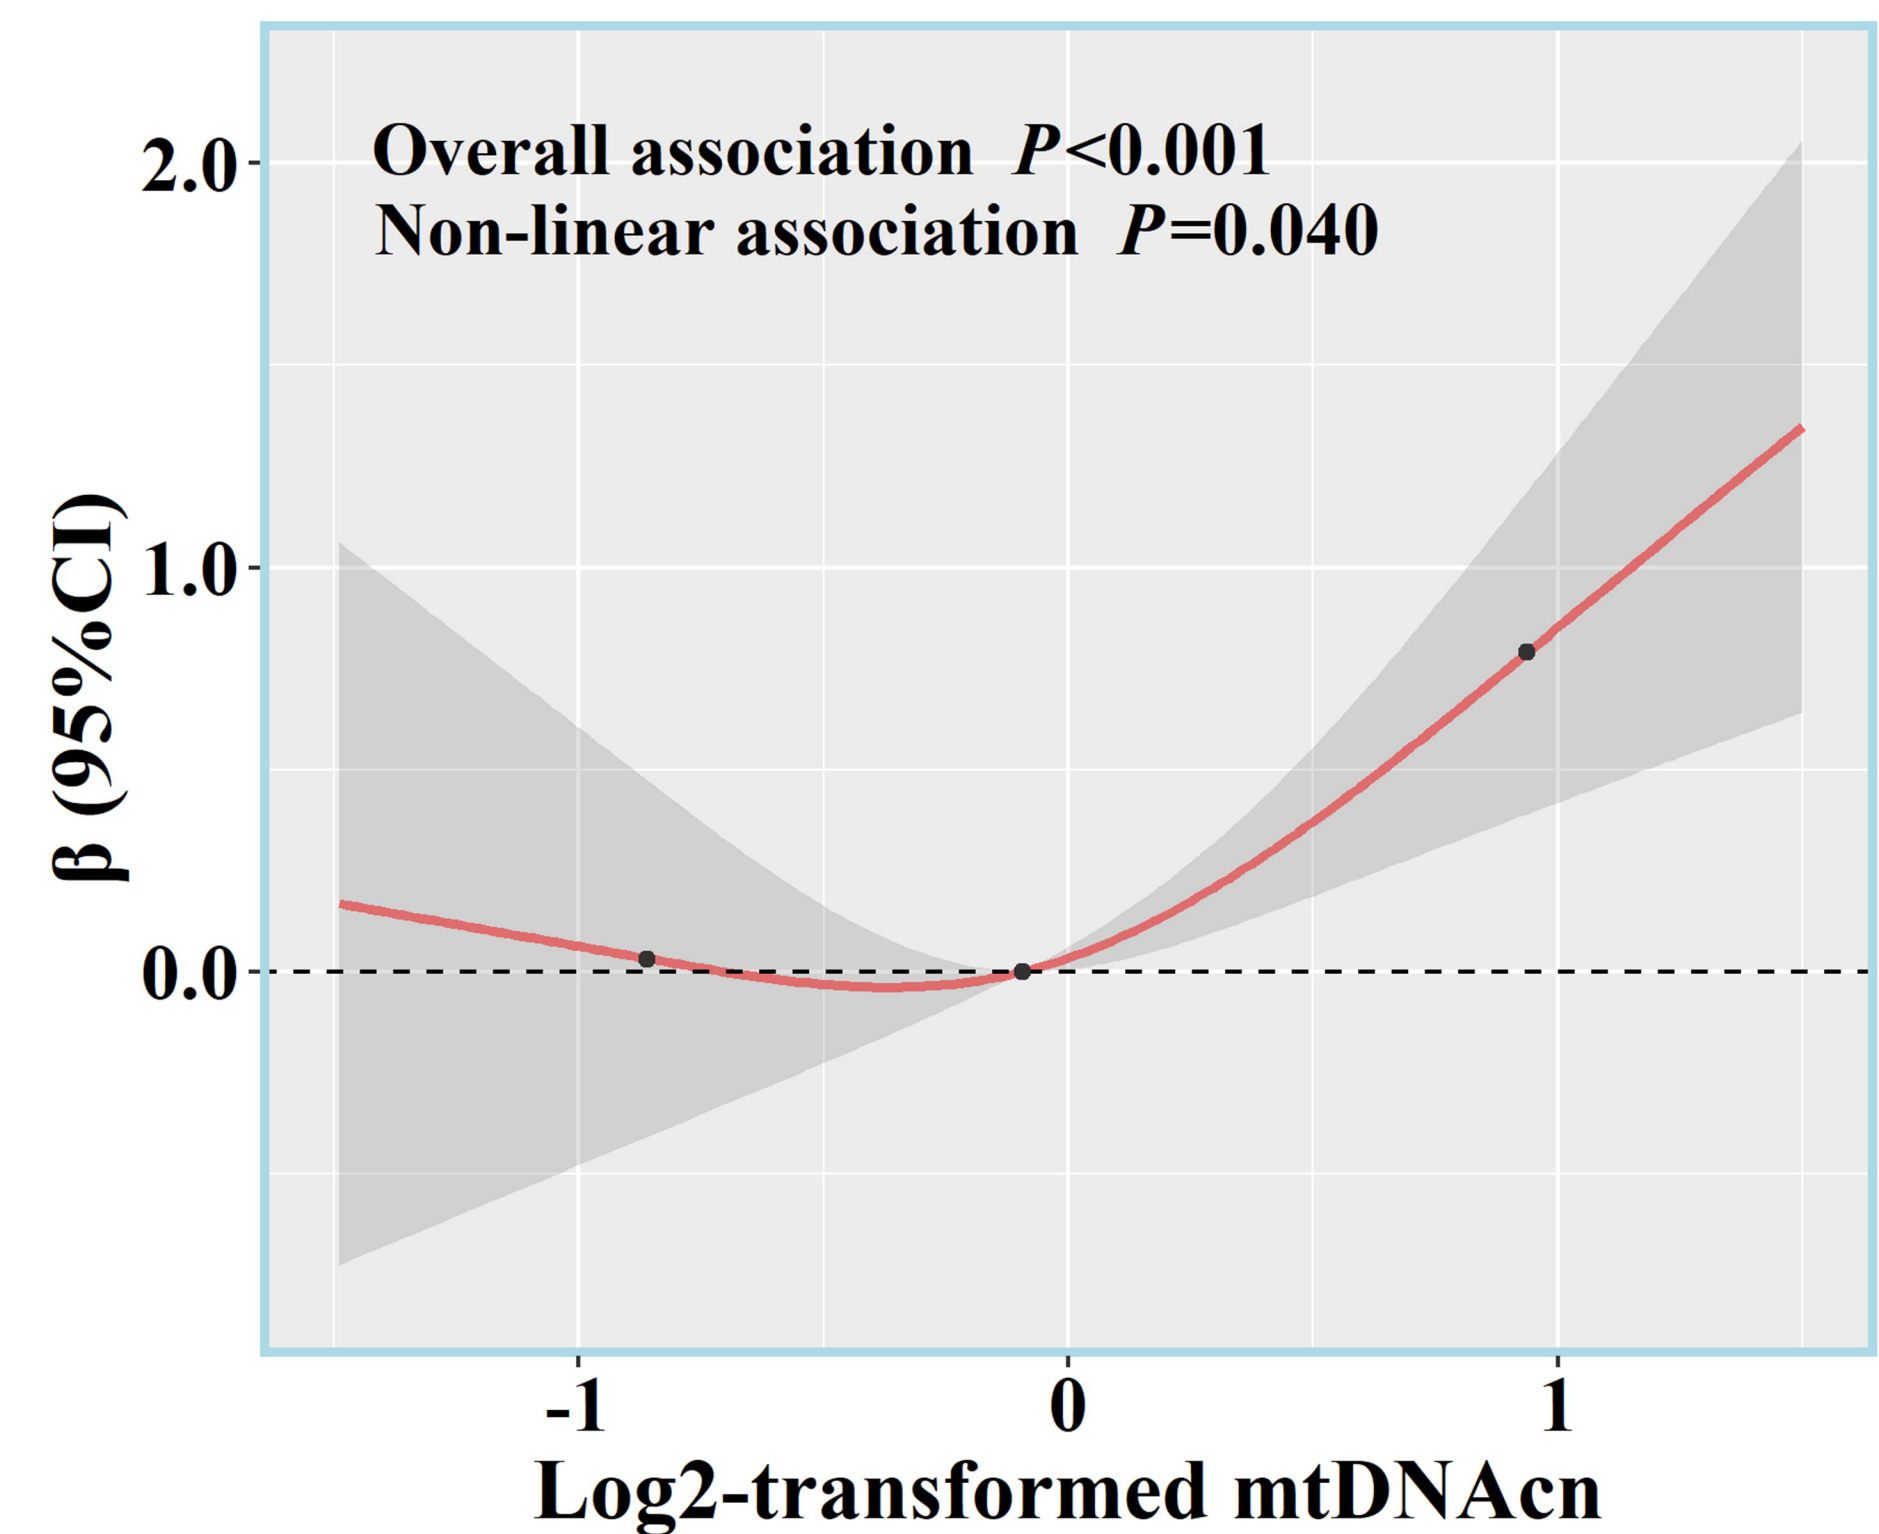**C. EC**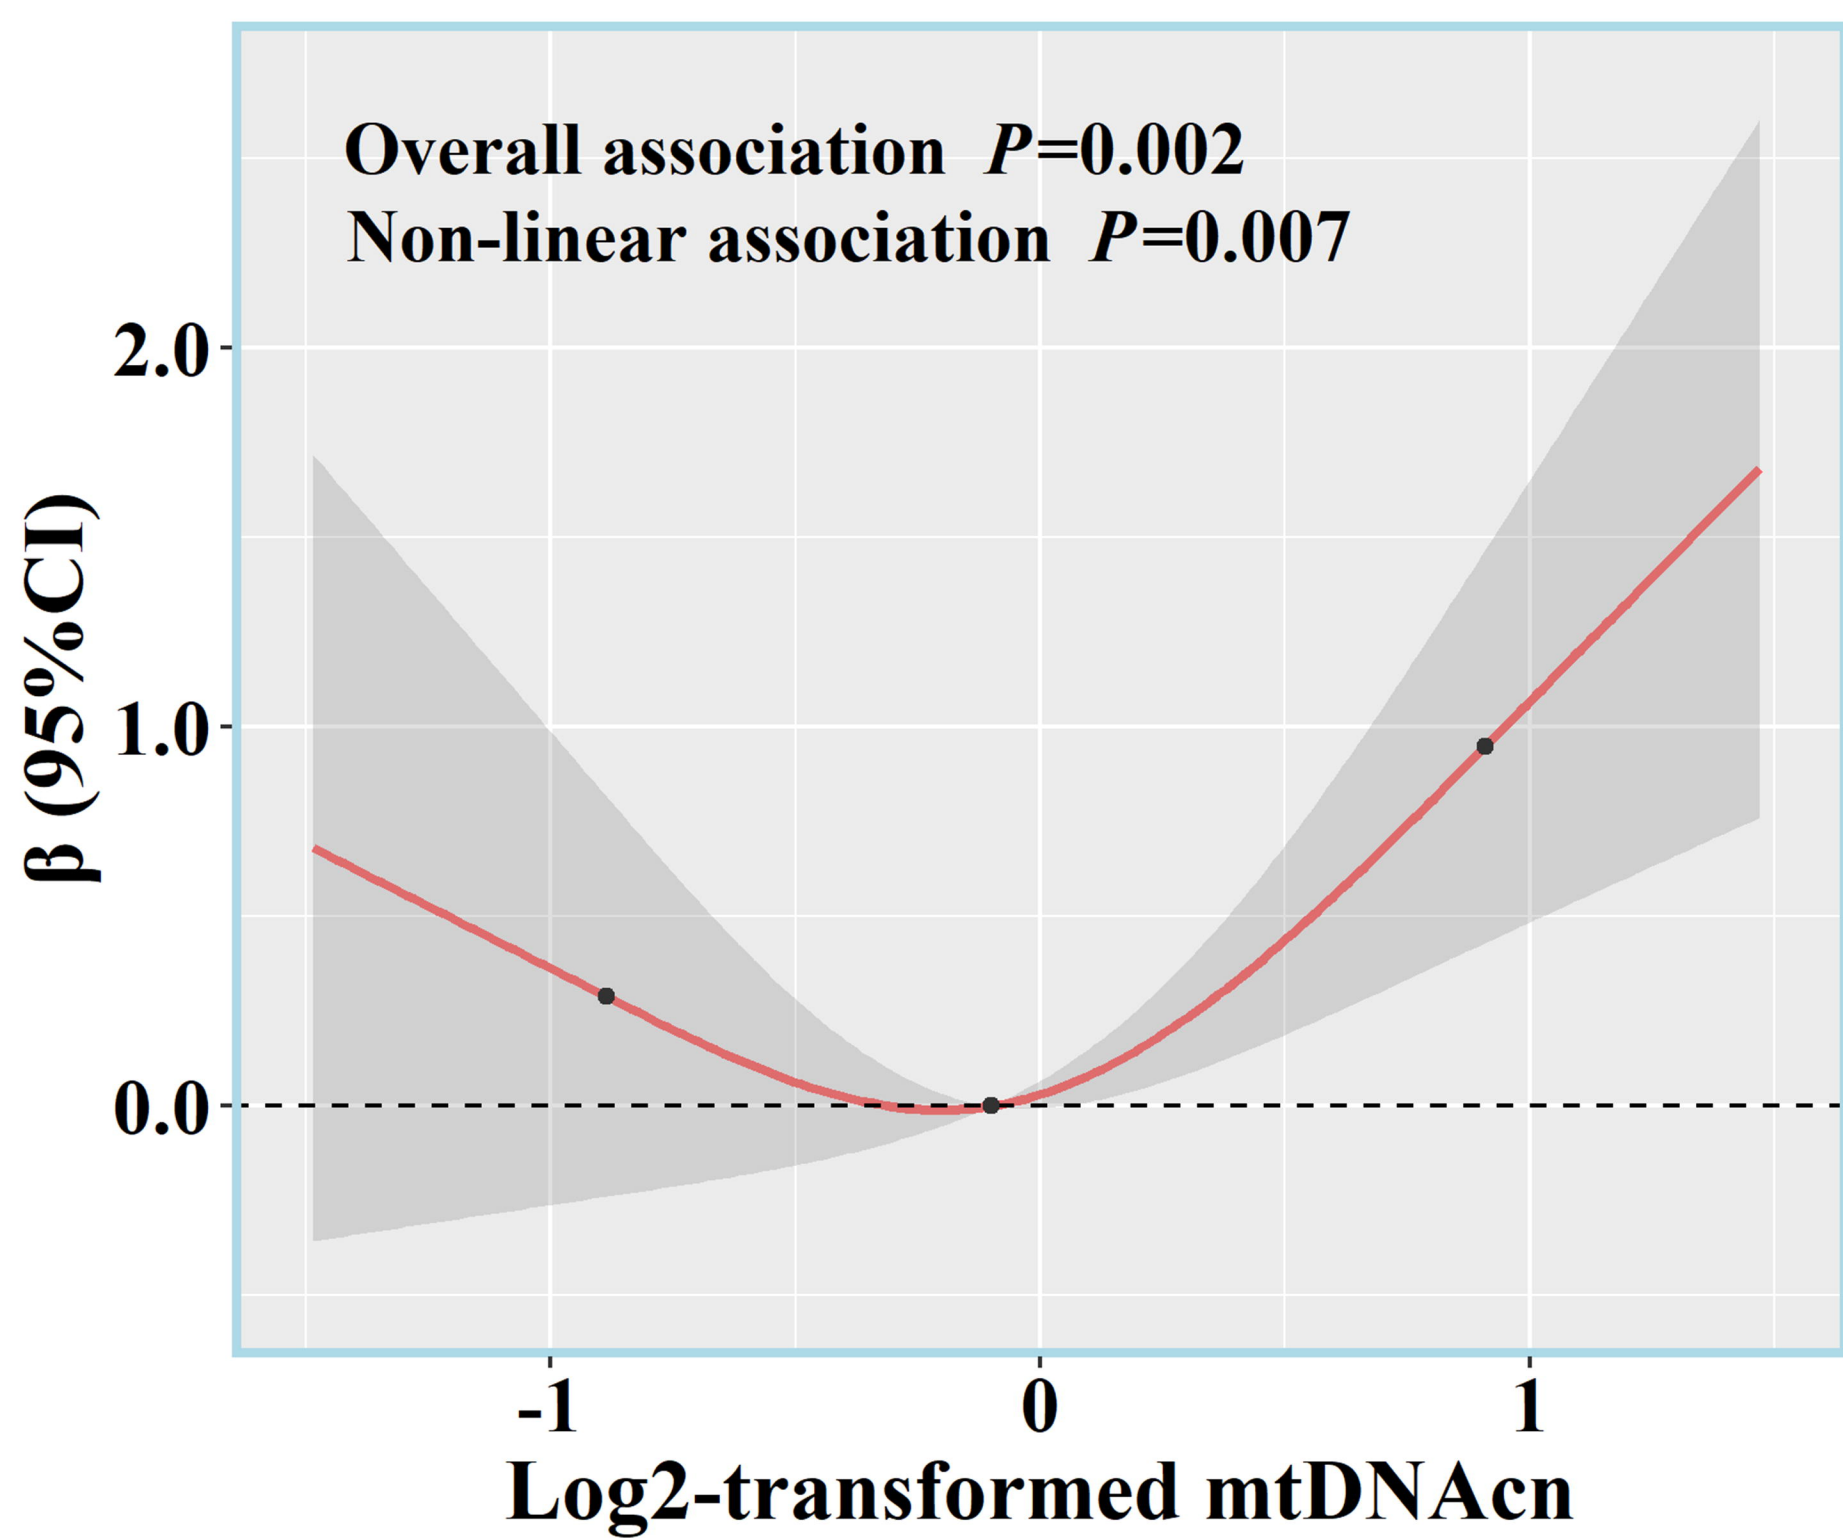**D. Total GICs**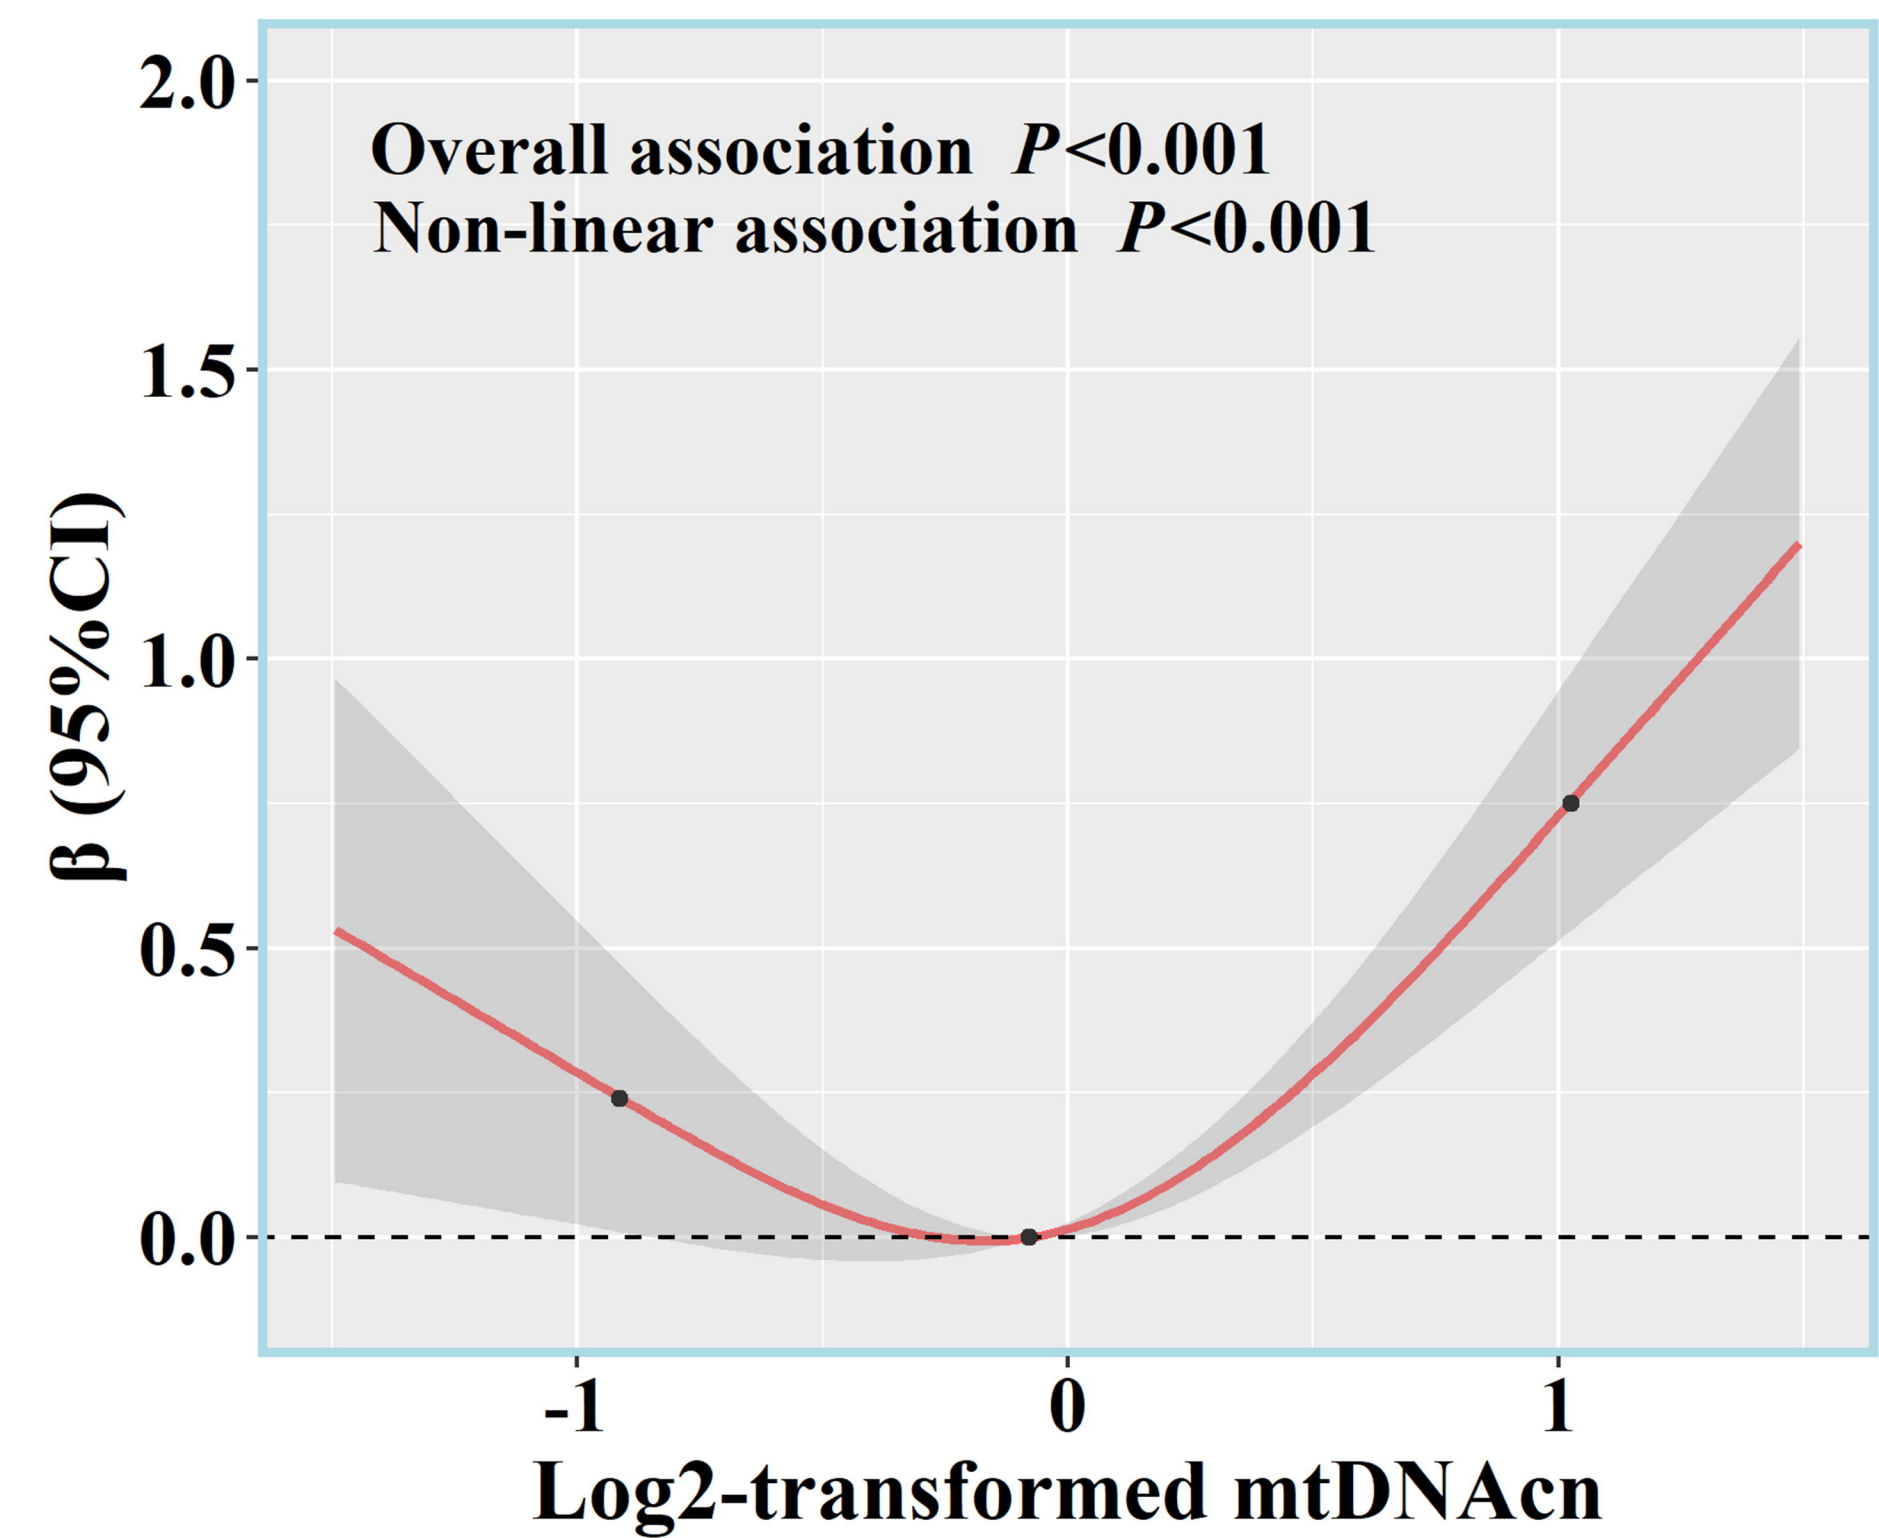

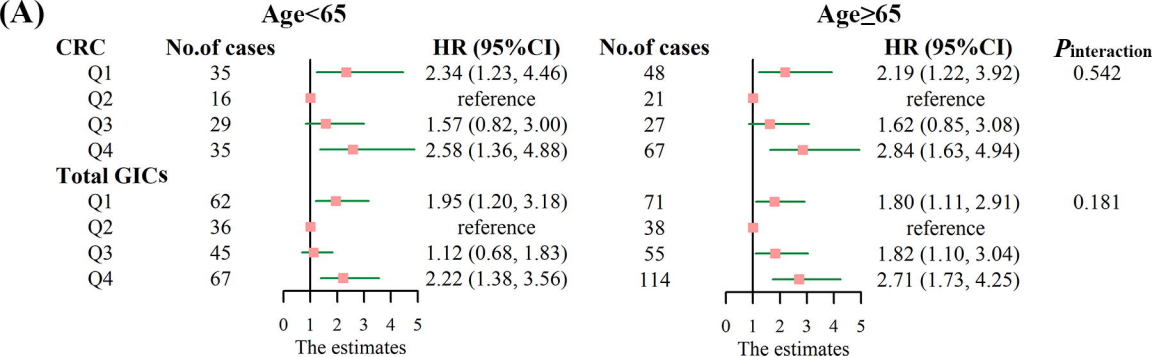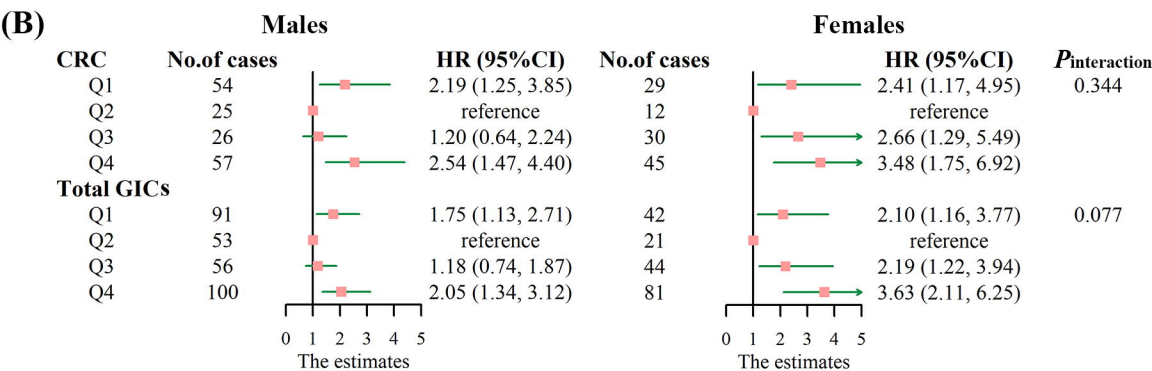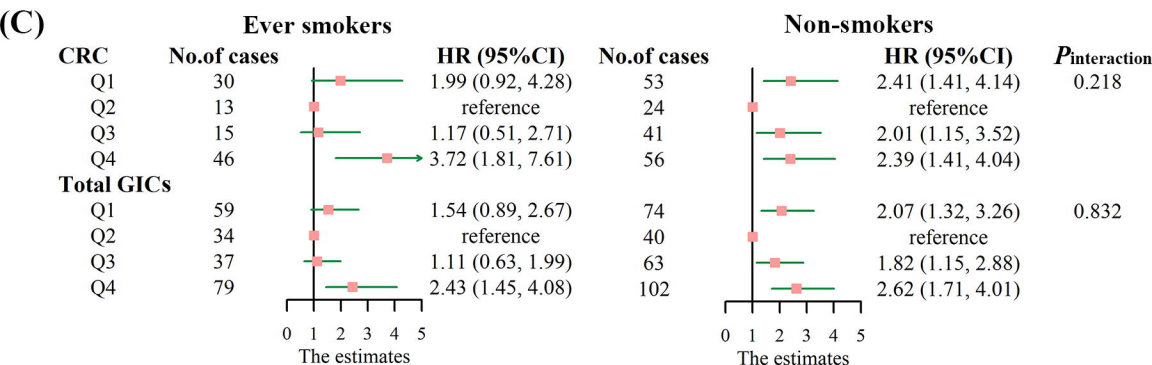

**A. CRC**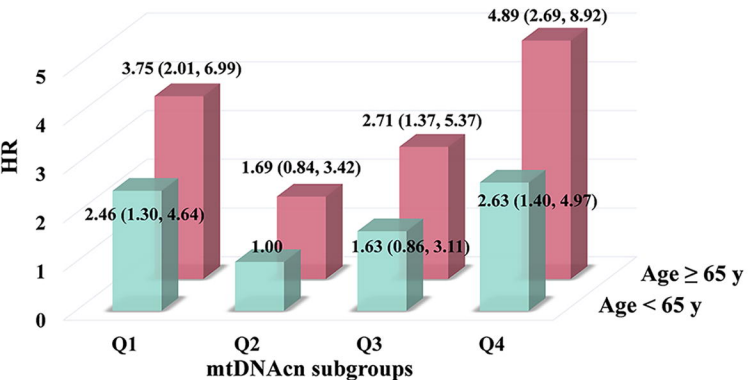**B. CRC**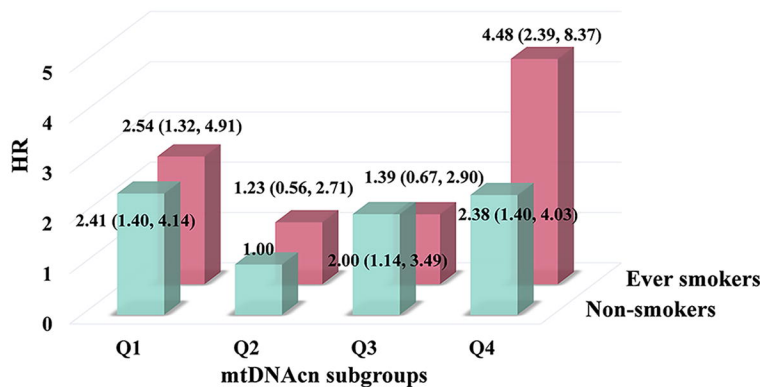**C. Total GICs**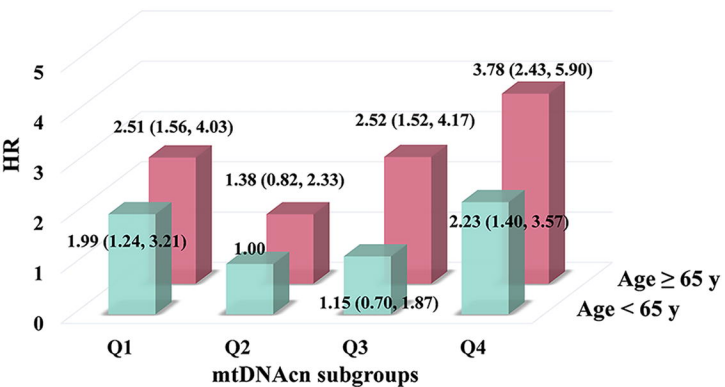**D. Total GICs**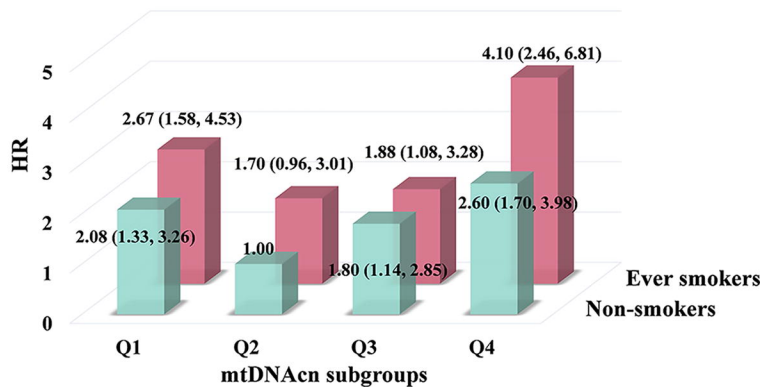

Source: https://www.medrxiv.org/content/10.1101/2021.12.25.21268390v1.full.pdf
